# Supplementary material for: Cascading effects of soil salinization on agricultural soil biodiversity-multifunctionality relationship
Source: Research Square preprint supplement (doi:10.21203/rs.3.rs-5835602/v1), 2025-02-07
Supplement: Supplementary file 1 [file c9858edc91a5775345fad1d5.docx]

**Cascading effects of soil salinization to soil biodiversity-multifunctionality relationship**

**Supplementary Information**

**Supplementary Text 1. Methods of soil physical and biochemical analysis**

Soil EC and pH values are determined in a 1:5 soil-to-water suspension using a soil conductivity meter and pH meter, respectively1. Soil texture, including the percentage content of sand, silt, and clay, is measured with a MasterSizer 2000 laser particle size analyzer2. Soil aggregation is assessed using the dry sieving method with sieve sizes of 2 mm, 1 mm, 0.5 mm, 0.25 mm, and 0.053 mm, followed by calculations of average mass diameter (MWD) and geometric mean diameter (GMD), aggregates larger than 0.25 mm are defined as water-stable aggregates (R0.25)3. The bulk density (BD) of undisturbed soil and soil porosity are determined using the ring knife method4. Total soil organic carbon (SOC) is measured in all composite samples after oxidation with a mixture of potassium dichromate and sulfuric acid, followed by colorimetric determination5. Total soil nitrogen (TN) is assessed using an elemental analyzer (C/N Flash EA 112 Series Leco TruSpec)6. Total phosphorus (TP) in all composite samples is determined after nitric acid-perchloric acid digestion using an inductively coupled plasma optical emission spectrometer (ICAP 6500 DUO; Thermo Scientific)7. Carbon-to-nitrogen, carbon-to-phosphorus, and nitrogen-to-phosphorus ratios are calculated based on the elemental proportions. Total potassium (TK) is extracted using hydrofluoric acid digestion, and available soil potassium (AK) is extracted with neutral ammonium acetate, followed by flame photometry for quantification8. Alkali-hydrolyzable nitrogen (AN) is determined after alkaline hydrolysis, with borate absorption and subsequent standard acid titration9. Available phosphorus (AP) in the soil is measured after sodium fluoride-hydrochloric acid extraction, using the colorimetric method10. Microbial biomass carbon (MBC), microbial biomass nitrogen (MBN), and microbial biomass phosphorus (MBP) are determined using the chloroform fumigation method11. The activity of soil β-glucosidase (BG) is measured colorimetrically12. The activity of phosphatase enzymes in the soil is determined spectrophotometrically13. Dehydrogenase enzyme activity is assessed based on iodonitrotetrazolium chloride method14. Urease enzyme activity is measured using the indigo method by monitoring the production of ammonia13. Sucrase enzyme activity in the soil is determined with the generation of reducing sugars measured. N-acetyl-β-glucosaminidase (NAG) activity is assessed with the production of p-nitrophenol measured15. Leucine aminopeptidase (LAP) activity is determined using the p-nitrophenyl substrate method, with the generation of p-nitroaniline measured16. Cellobiosidase enzyme activity in the soil is measured colorimetrically by monitoring the production of p-nitrophenyl cellobioside17. Catalase enzyme activity is determined, with the change in absorbance due to the decomposition of hydrogen peroxide measured18.

**Supplementary Text 2. Detailed steps of a bioinformatics pipeline**

Following sequencing, the raw data were meticulously processed to eliminate low-quality sequences and contaminants, specifically adaptor and host sequences, utilizing the Fast QC (version 0.11.8) and BWA (version 0.7.12) software packages19. Subsequently, the refined reads underwent assembly via MEGAHIT (version 1.1.1), with a minimum contig length threshold set at 500 bp. Contigs exhibiting less than 60% coverage were excluded using Salmon20. Gene prediction was then performed on the assembled contigs using Prodigal (version 2.6.3), and the resultant open reading frames (ORFs) were clustered into a non-redundant set by applying CD-HIT (version 4.6.7) with a 95% sequence identity cutoff21. Subsequently, a pan-metagenome was constructed to assess alterations in metagenome functionality subsequent to the introduction of a starter culture. Clean reads were utilized to generate contigs for each sample using MegaHit, with a minimum contig length parameter of 500 bp22. ORFs were predicted from these assembled contigs via Prodigal, and clustering with CD-HIT yielded a unique set of genes21. The longest sequence within each cluster was designated as the representative gene for the unique gene set23. Salmon was employed to quantify gene abundance across samples by tallying the reads per gene20.

**Supplementary Text 3. Differences in abundance of different biological communities in non-salinized and salinized soils.**

By comparing the changes of the top ten genera in the five microbial communities (bacteria, fungus, archaea, protist, and metazoans) under non-saline and saline soil, we found that *Anaerolinea*, *Pseudarthrobacter*, *Polaromonas*, *Mrakia*, *Mortierella,* and *Chlamydomonas* decreased significantly in the saline soil (*P* < 0.05) (Fig. S3A, B, D). These microbial groups are extensively involved in the decomposition of soil organic matter and the cycling of nutrients, and their significant reduction in abundance leads to a weakened association with soil-related functions compared to non-salinized soils (Fig. S7A, B). However, the abundance of Fusarium increased significantly in high salinity environments (*P* < 0.05) (Fig. S3B), and it is significantly correlated with soil pathogen control functions in salinized soils (Fig. S7B). The abundance of certain microbial species highly adapted to saline environments increased significantly (such as *Archaeorhizomyces* and *Halalkalicoccus*) (*P* < 0.05) (Fig. S3B, C), which may enhance functions related to salt conversion and cycle. In protist communities, *Deviata* and *Pseudochilodonopsis* showed decreased abundance in salinized soils (*P* < 0.05) (Fig. S3D), and they are significantly correlated with soil water regulation capabilities and plant productivity functions in salinized soils (Fig. S7B). In metazoans communities, the abundance of *Ilyocypris* decreased, while the abundance of *Flamella* and *Acrobeloides* groups increased in salinized soils (*P* < 0.05) (Fig. S3E). These groups of organisms may play an important role in maintaining soil symbiotic relationships, pathogen control, and ARG control in salinized soils (Fig. S7B).

**Supplementary Text 4. Logic behind model construction and references for structural equation model**

Fig. S10 Briefly described the logic behind model construction for structural equation model to dissect the influences of soil salinization on various biological communities.

① Soil salinization may directly influence the diversity and community composition of soil fungi24.

② Soil salinization directly affects the diversity and community composition of archaea25.

③ Soil salinization directly impacts the community composition of metazoans and soil fauna24.

④ Fungi and bacteria jointly participate in organic matter decomposition in soil, but they exhibit different efficiencies in decomposing organic matter of varying complexity. Bacteria are more efficient in utilizing simple organic compounds, whereas fungi have an advantage in decomposing complex organic compounds such as lignin and cellulose26. This difference leads to competition between them in the decomposition process, with fungi decomposing complex organic matter and releasing simple organic compounds that are subsequently utilized by bacteria26. Therefore, the richness and diversity of soil fungi have a significant impact on the assembly of bacterial communities. Studies have shown that an increase in fungal richness alters the β-diversity of bacterial communities, i.e., the degree of change in community composition27. Fungi decompose refractory organic matter through the secretion of extracellular enzymes, providing substrates for bacteria and thereby influencing the structure and function of bacterial communities26. In the context of soil salinization, competition between fungi and bacteria intensifies, which affects the stability and function of soil bacterial communities, subsequently exerting profound impacts on soil health and ecosystems28.

⑤ The activities of soil fungi can alter the community structure of soil archaea. This change may result from fungi altering the soil's chemical environment through their metabolic activities, thereby influencing the survival conditions of archaea29.

⑥ Protozoa are one of the primary predators of bacteria, obtaining nutrition by preying on them30. This predation behavior significantly affects the structure and function of bacterial communities, for example, by reducing the abundance and diversity of certain bacteria31. Some bacteria can survive within protozoan cells, forming endosymbiotic relationships32. This symbiosis not only protects bacteria from predation but also provides them with a relatively stable living environment conducive to their growth and reproduction. For instance, Legionella pneumophila can survive within Acanthamoeba cells and use them as a transmission vector.

⑦ Archaea serve as a food source for animals. For example, in deep-sea methane seep ecosystems, symbiotic aggregates formed by archaea and bacteria are the primary food source for certain annelid worms33.

⑧ Protozoa are one of the main predators of numerous small multicellular organisms, such as nematodes and rotifers34. They obtain nutrition by preying on these multicellular organisms, thereby influencing the population density and distribution of metazoans. Protozoa and metazoans compete for resources34. For example, in soil ecosystems, protozoa and metazoans (such as nematodes) both prey on bacteria, and their competition affects their respective positions and functions within the ecosystem.

Fig. S11 Briefly described the logic behind model construction for structural equation model to dissect the interconnections between soil multitrophic biodiversity and soil function.

①Soil salinization directly influences soil microbial communities28.

②Soil salinization reduces soil porosity, diminishing the soil's water regulation capacity35, as well as affecting the activity of soil pathogens24.

③Soil salinization changed soil structure significantly36.

④Soil salinization leads to salt stress in crops, affecting crop productivity37, 38. Besides, soil salinization directly affects fungal communities, impacting the activity of arbuscular mycorrhizal fungi, and consequently, soil symbiotic relationships28.

⑤Soil salinization directly affects the availability of nitrogen, phosphorus, and potassium, thereby impacting soil fertility39, 40, 41. The soil's carbon sequestration function is highly correlated with soil nutrient availability42.

⑥⑦Soil salinization directly influences microbial communities, which further impact the expression of antibiotic resistance genes43.

⑧Microbial communities alter soil nitrogen and phosphorus mineralization, the absorption and maintenance of available potassium and magnesium, thereby affecting the effectiveness of soil fertility5, 39, 44. Besides, soil microbial communities affect the decomposition process of soil organic matter45. Further, soil microbial communities impact the soil's carbon sequestration function through the microbial carbon pump45, 46.

⑨The expression of antibiotic resistance genes affects crop productivity47.

⑩The decomposition process of soil organic matter affects crop productivity48. The soil's carbon sequestration function is highly correlated with crop productivity49.

⑪Soil carbon sequestration capacity, nutrient availability, and soil structure are usually highly correlated36.

⑫Soil structure affects crop growth, thereby influencing crop productivity50.

⑬The soil structure significantly affects the hydraulic characteristics of the soil and may have an impact on the control function of pathogenic bacteria35.

**Supplementary Text 5. Details of performing K-means clustering analysis**

To determine the optimal number of clusters, we calculated the within groups sum of squares for varying numbers of clusters. Specifically, we computed the within groups sum of squares (WSS) values for 1 to 15 cluster centers and plotted the elbow chart (Fig. S10). The elbow chart, by graphing the relationship between WSS and the number of clusters, helps us visually identify the "elbow point" of the cluster number, where the rate of decrease in WSS significantly slows down, which is generally considered the optimal number of clusters51. The results indicate that when the number of clusters is 5, the rate of decrease in the within-cluster sum of squares significantly slows down, suggesting that 5 cluster centers can adequately describe the structure of the data. Finally, the k-means algorithm was used for cluster analysis of the data52.

**Supplementary Text 6. Details of** **constructing generalized linear model**

In our analysis, we initially transformed the variables to satisfy the assumptions of Generalized Linear Models (GLMs), including proper scaling or normalization of the response variable53. For model specification, we formulated a GLM for each soil factor in conjunction with EC, incorporating both the main effects and their interaction. The model was articulated as:

*Response ∼ Soil Factor + EC + Soil Factor × EC*

where an appropriate link function was selected based on the response variable's distribution; a Poisson link for count data or a logistic link for binary data. Utilizing the glm function from the "stats" package in R, we fitted the models, meticulously verifying the assumptions, including residual distribution and the exclusion of multicollinearity among predictors54. Subsequently, we appraised the models' fit through diagnostic plots and statistics such as residual analysis, deviance, and the AIC. Hypothesis tests were conducted on the model coefficients to assess the significance of the main effects and the interaction term. The coefficients of the GLMs were interpreted to elucidate the separate and joint impacts of soil factors and EC on the response variable, with confidence intervals used to evaluate the accuracy of these estimates and to report the significance levels of the coefficients54. Finally, to ascertain the most fitting model, we compared models both with and without interaction terms, using AIC as the criterion to select the model with the lowest value, indicating a better balance between model fit and complexity.


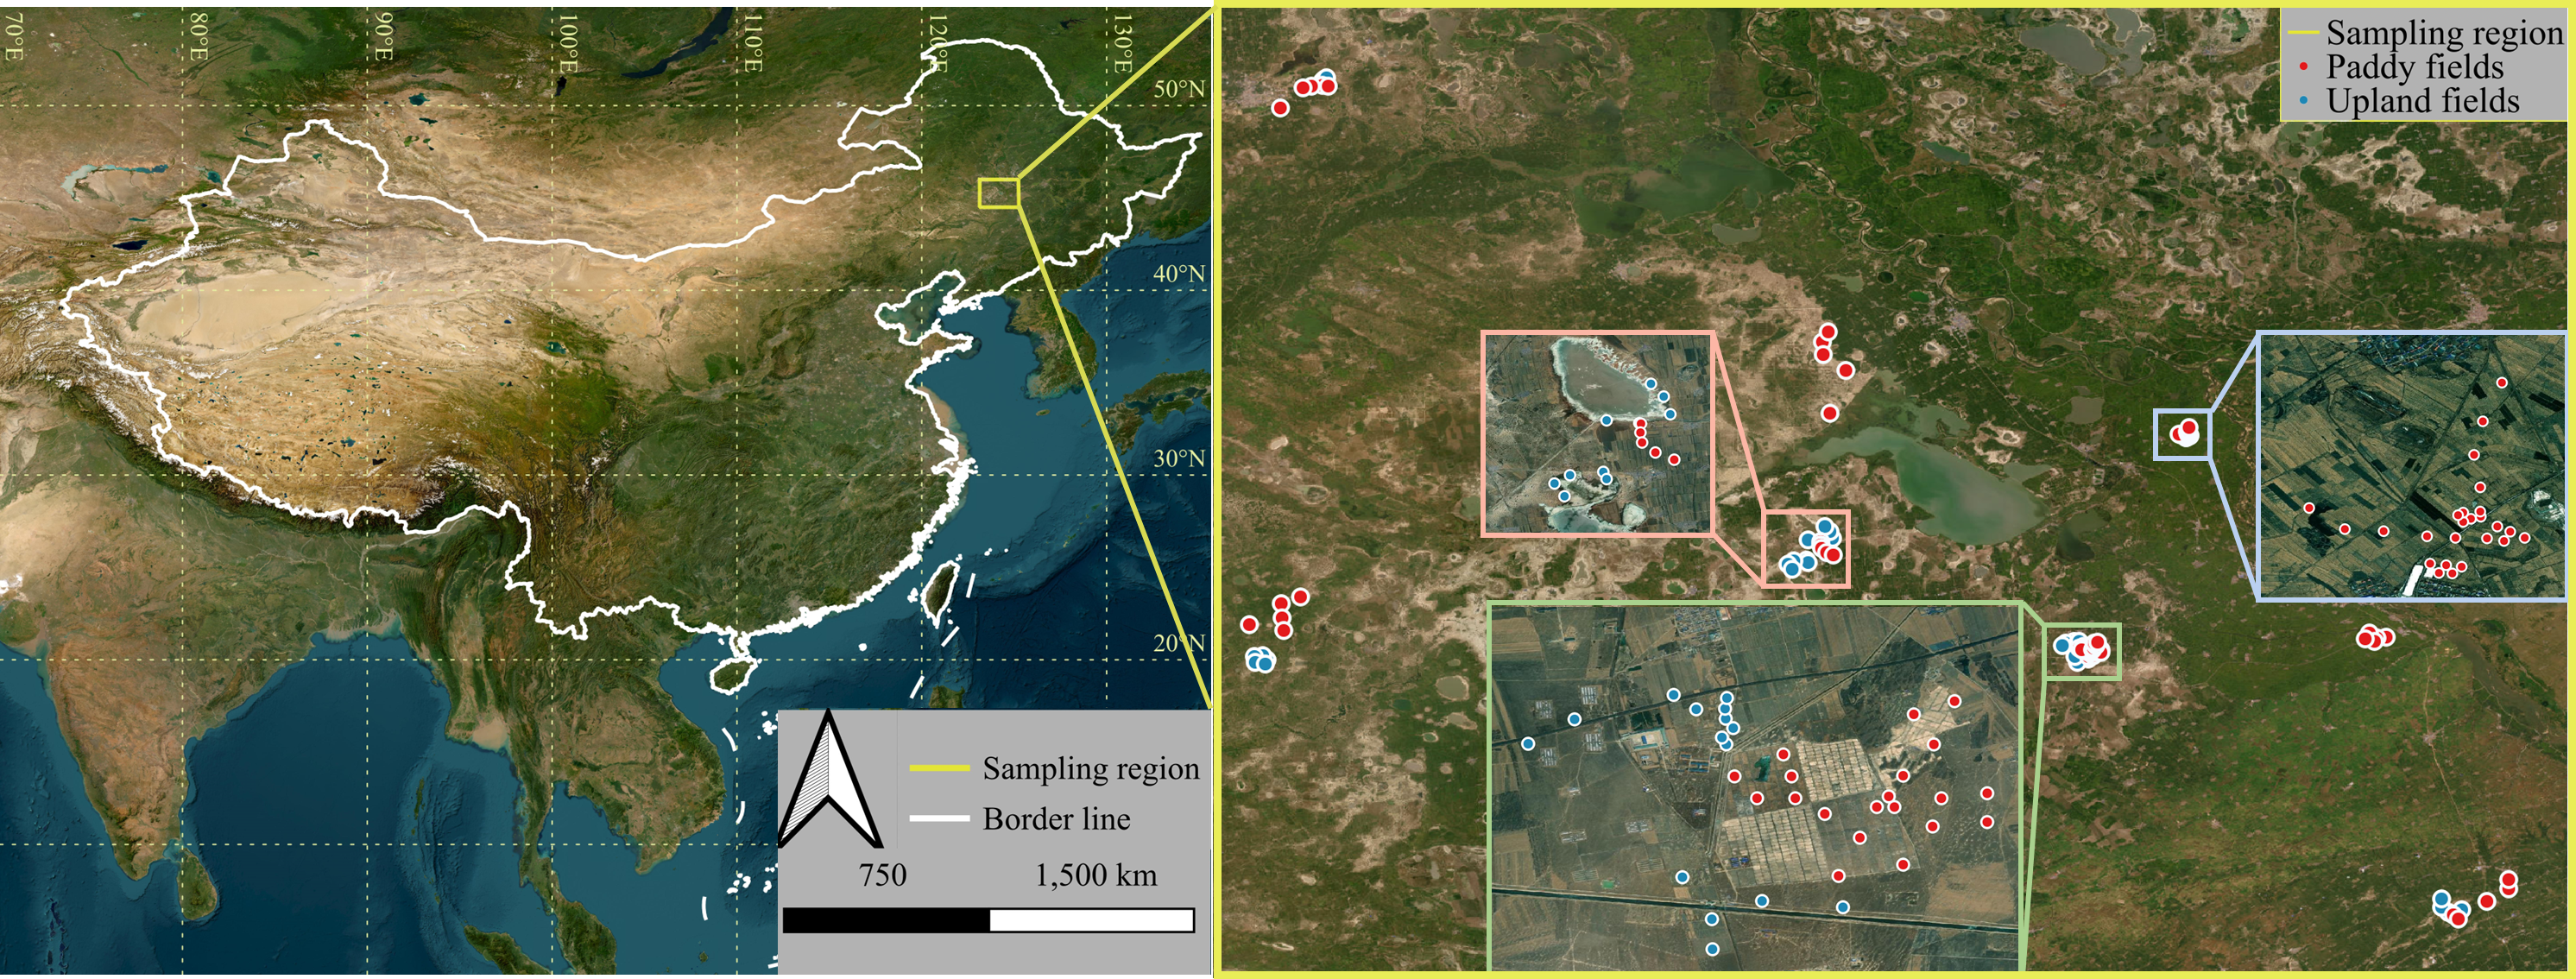


Fig. S1 Sampling region and specific distribution of 115 plots


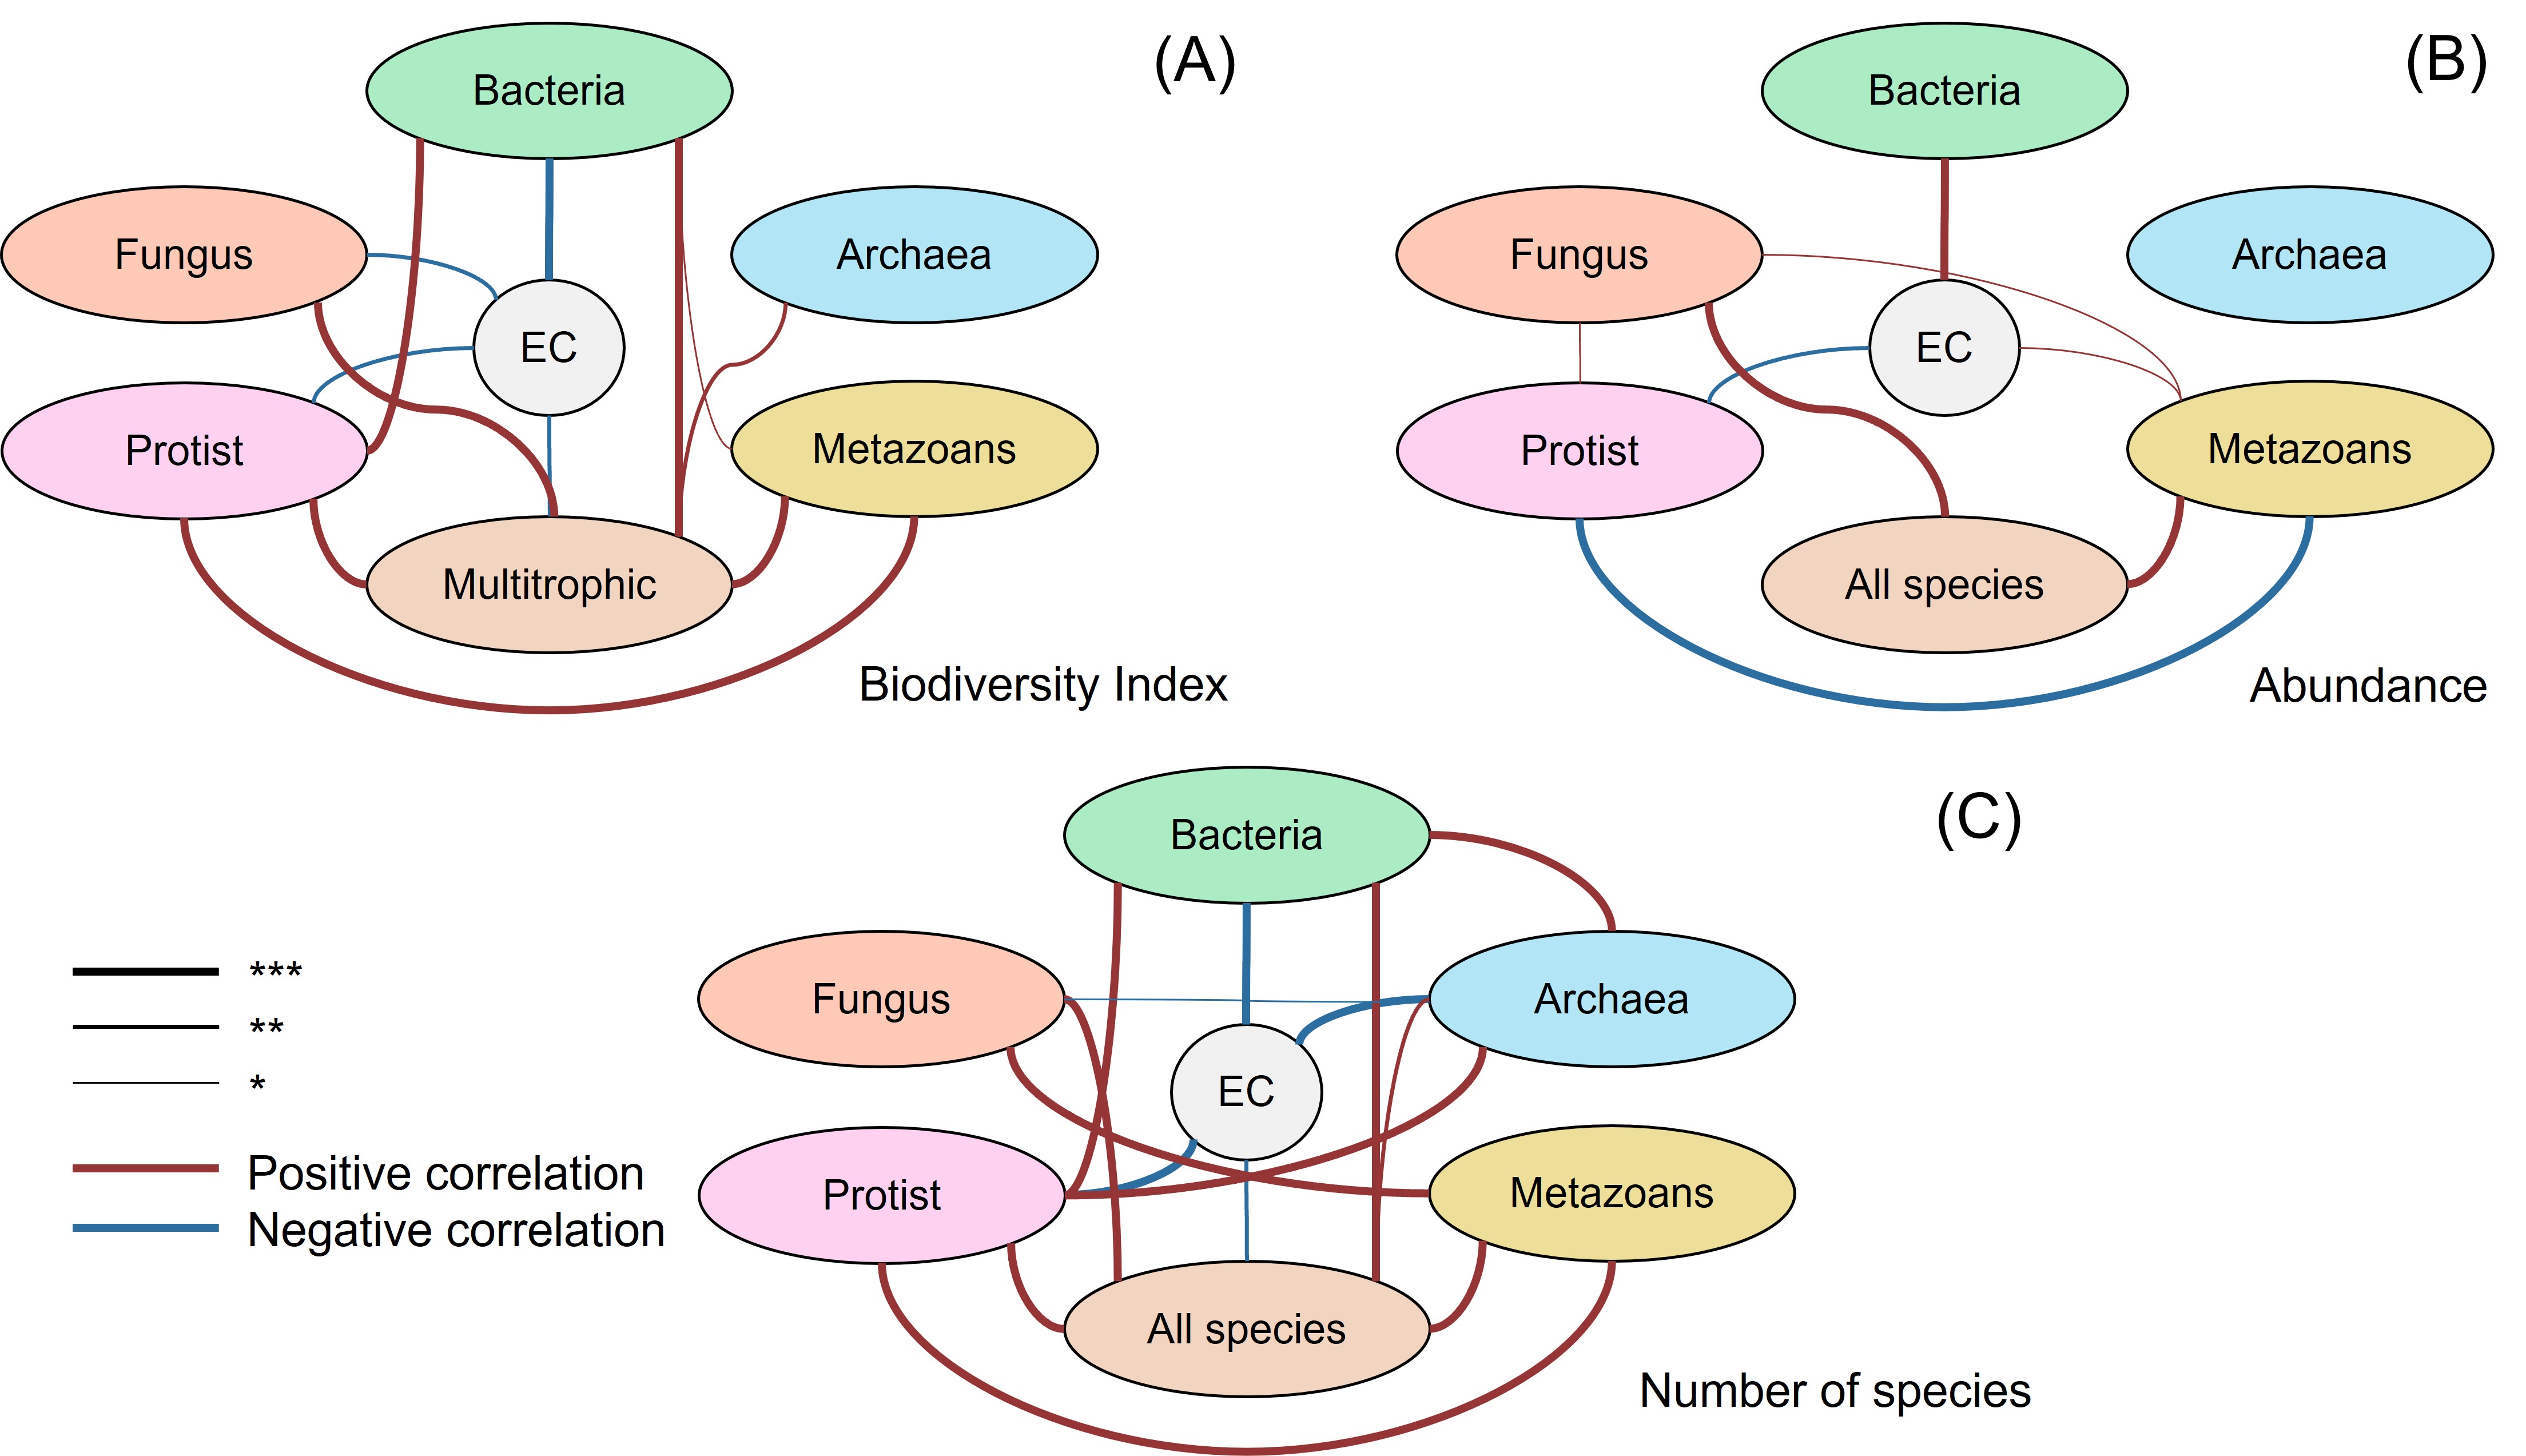


Fig. S2 Spearman correlation coefficients for soil EC, soil multidiversity (A), abundance of different soil biota groups (B), and number of soil biota species (C).


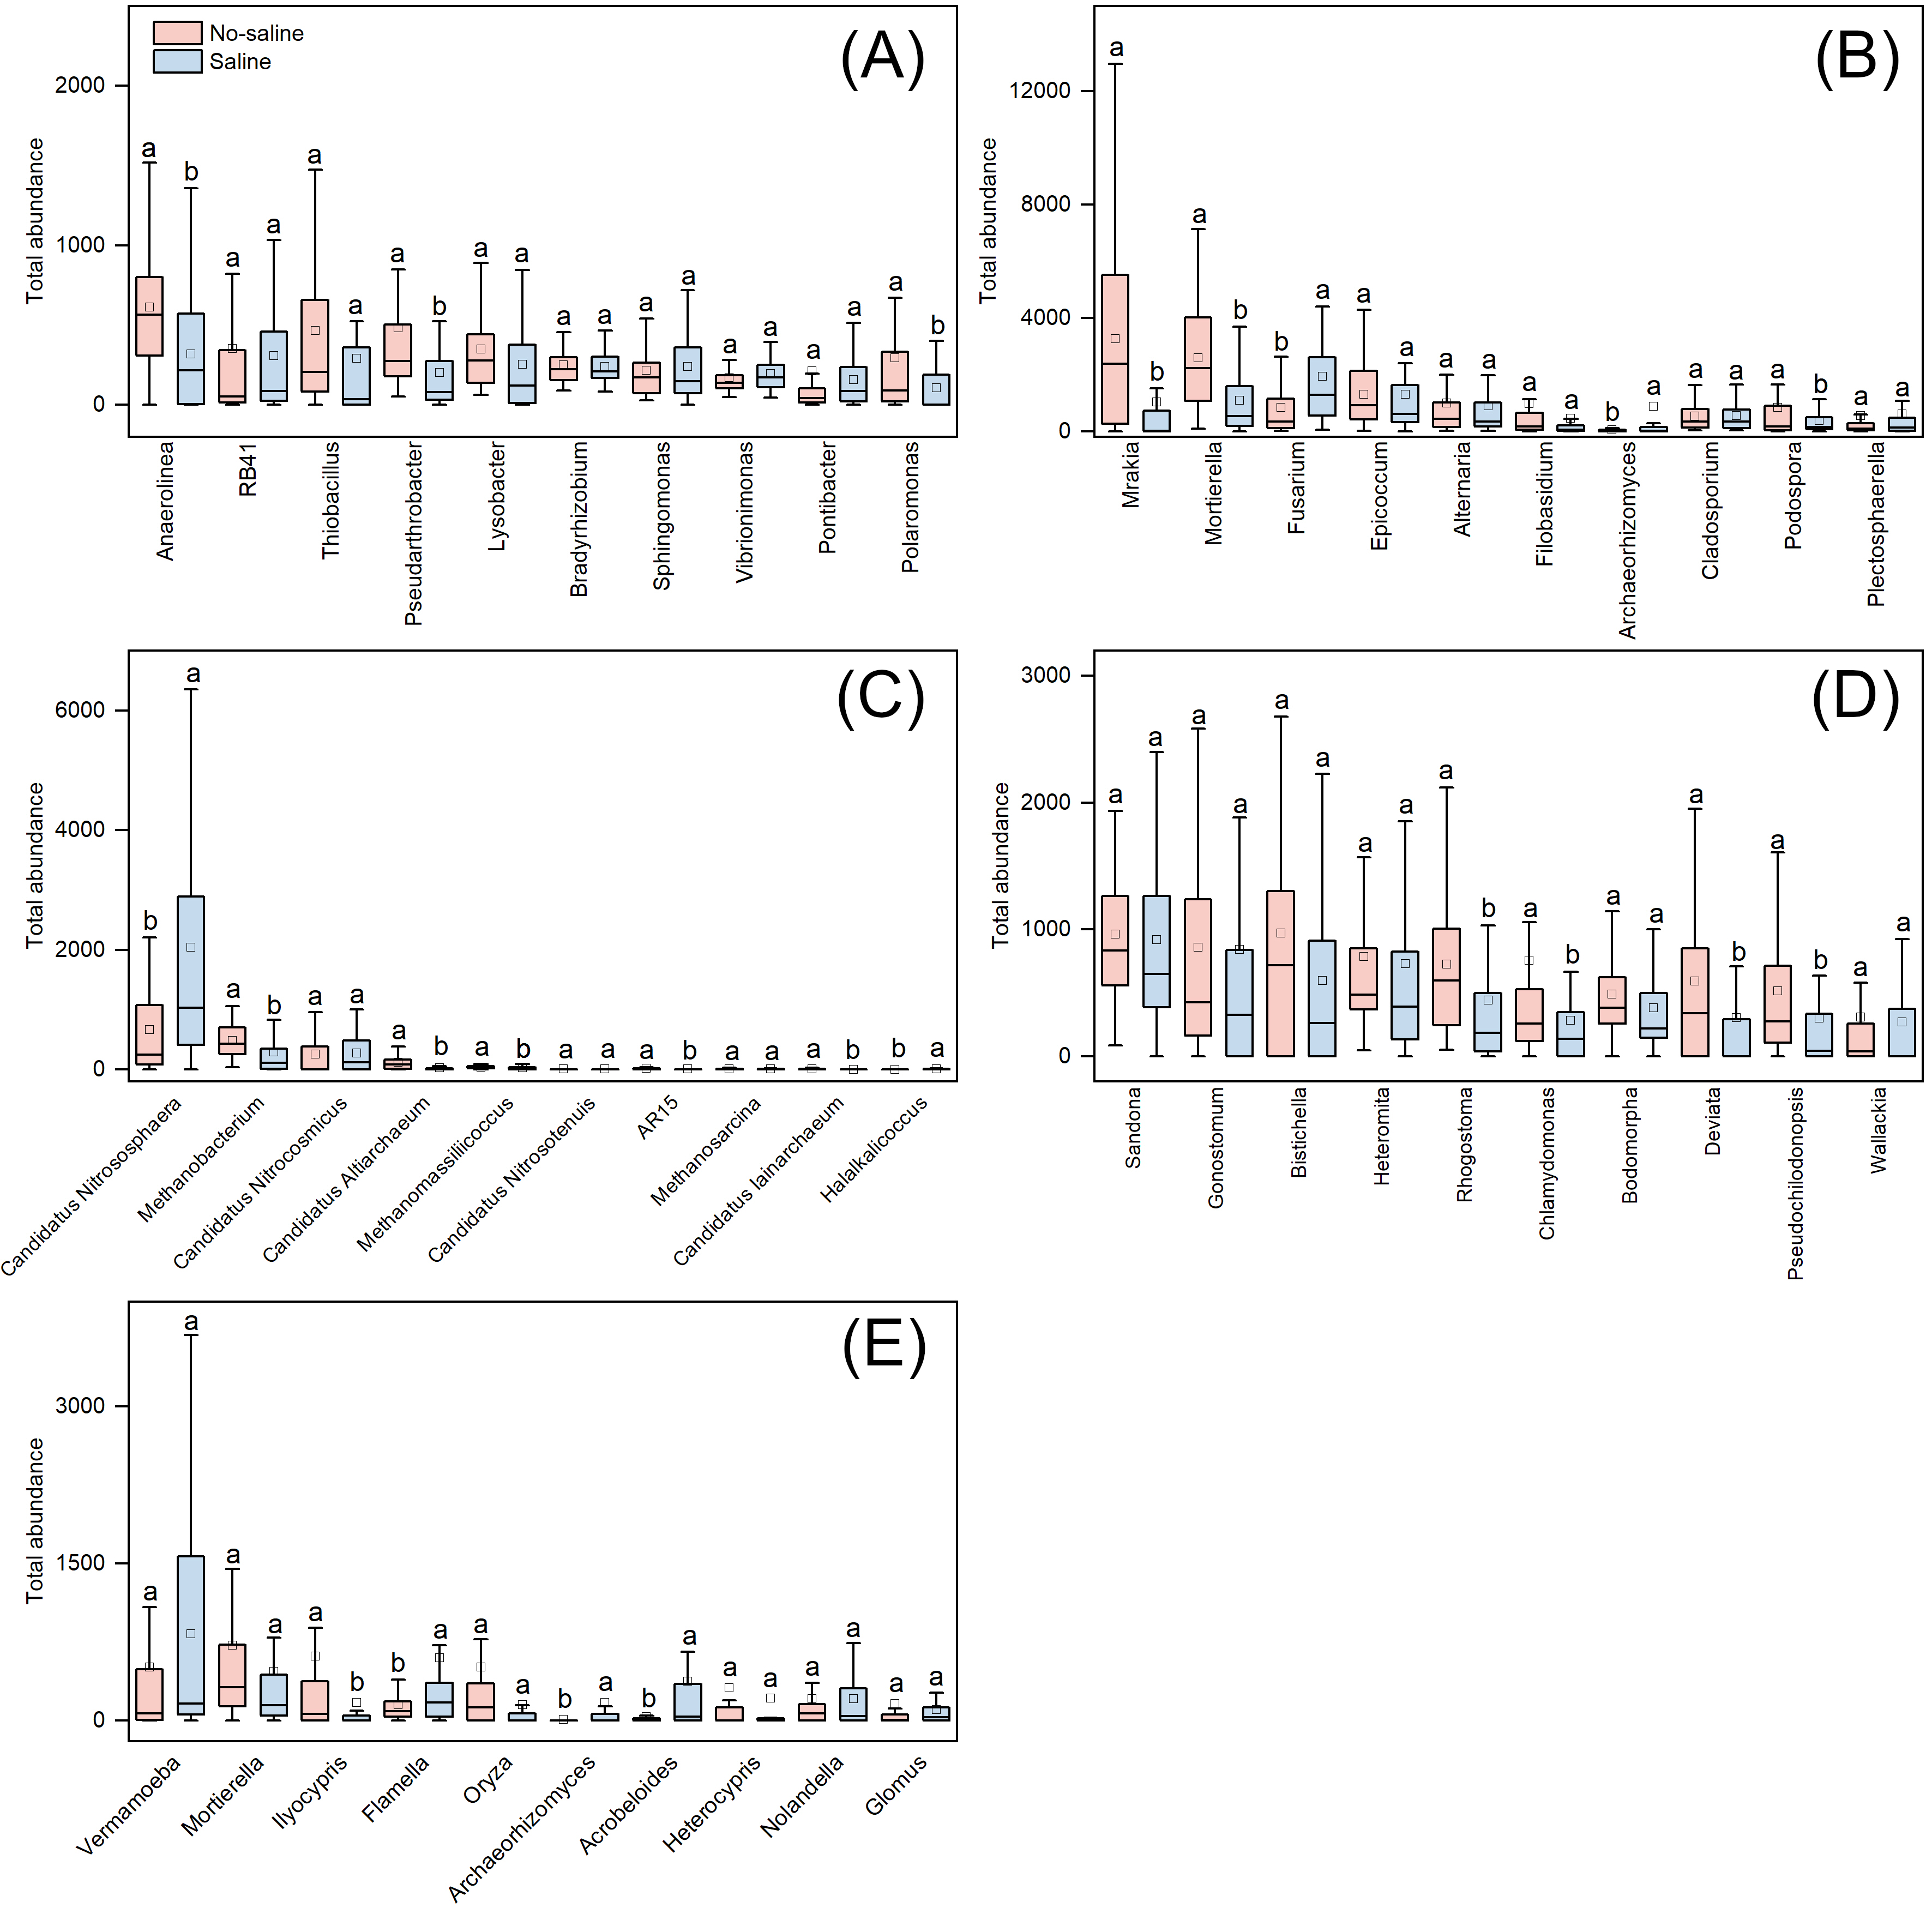


Fig. S3 Total abundance of top 10 genera in Bacteria (A), Fungus (B), Archaea (C), Protist (D) and Metazoans (E) community. Different lowercase letters indicate significant differences in total abundance between non-saline and saline soils.


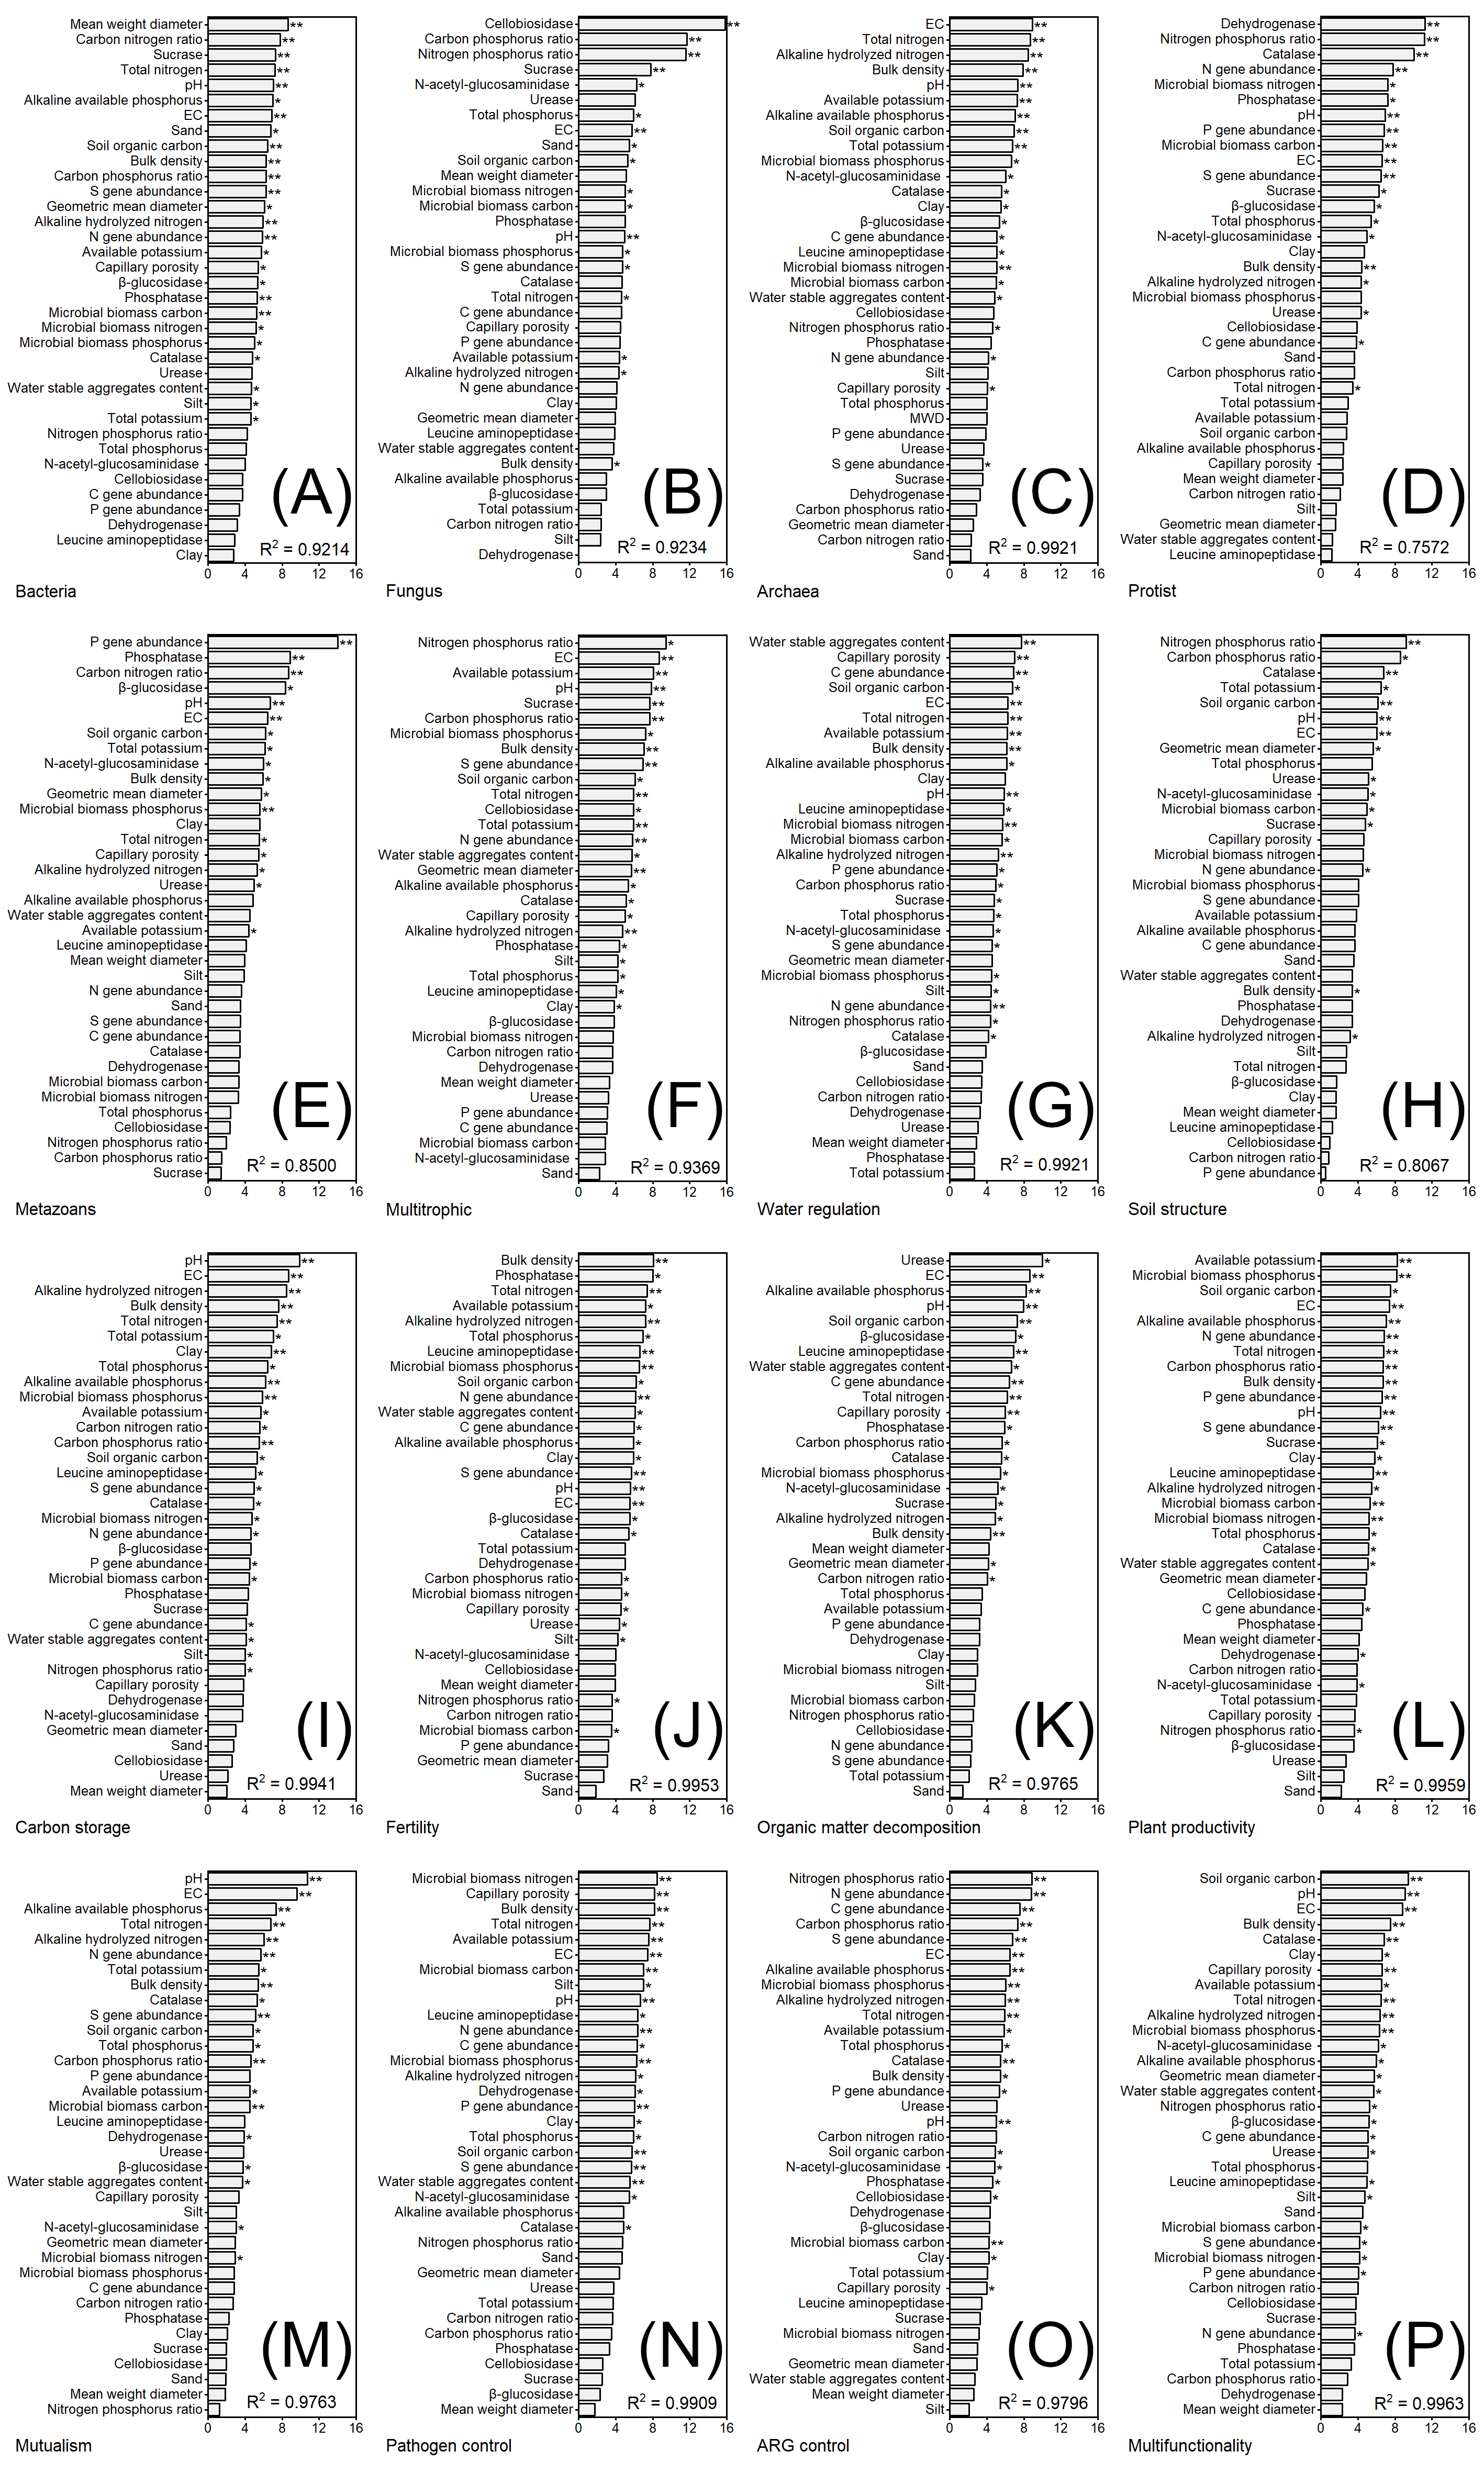


Fig. S4 Importance of soil properties in driving the distribution of soil multidiversity, individual soil function, and multifunctionality. We used a random forest algorithm to estimate the importance of environmental factors and presented their importance value as an increase in mean squared error (IncMSE, %). The numbers in the boxes represent the variation explained by the model, and asterisk above bars denotes a significant influential factor at the significance level. * represents P value < 0.05, ** represents P value < 0.01, *** represents P value < 0.001. Same below.


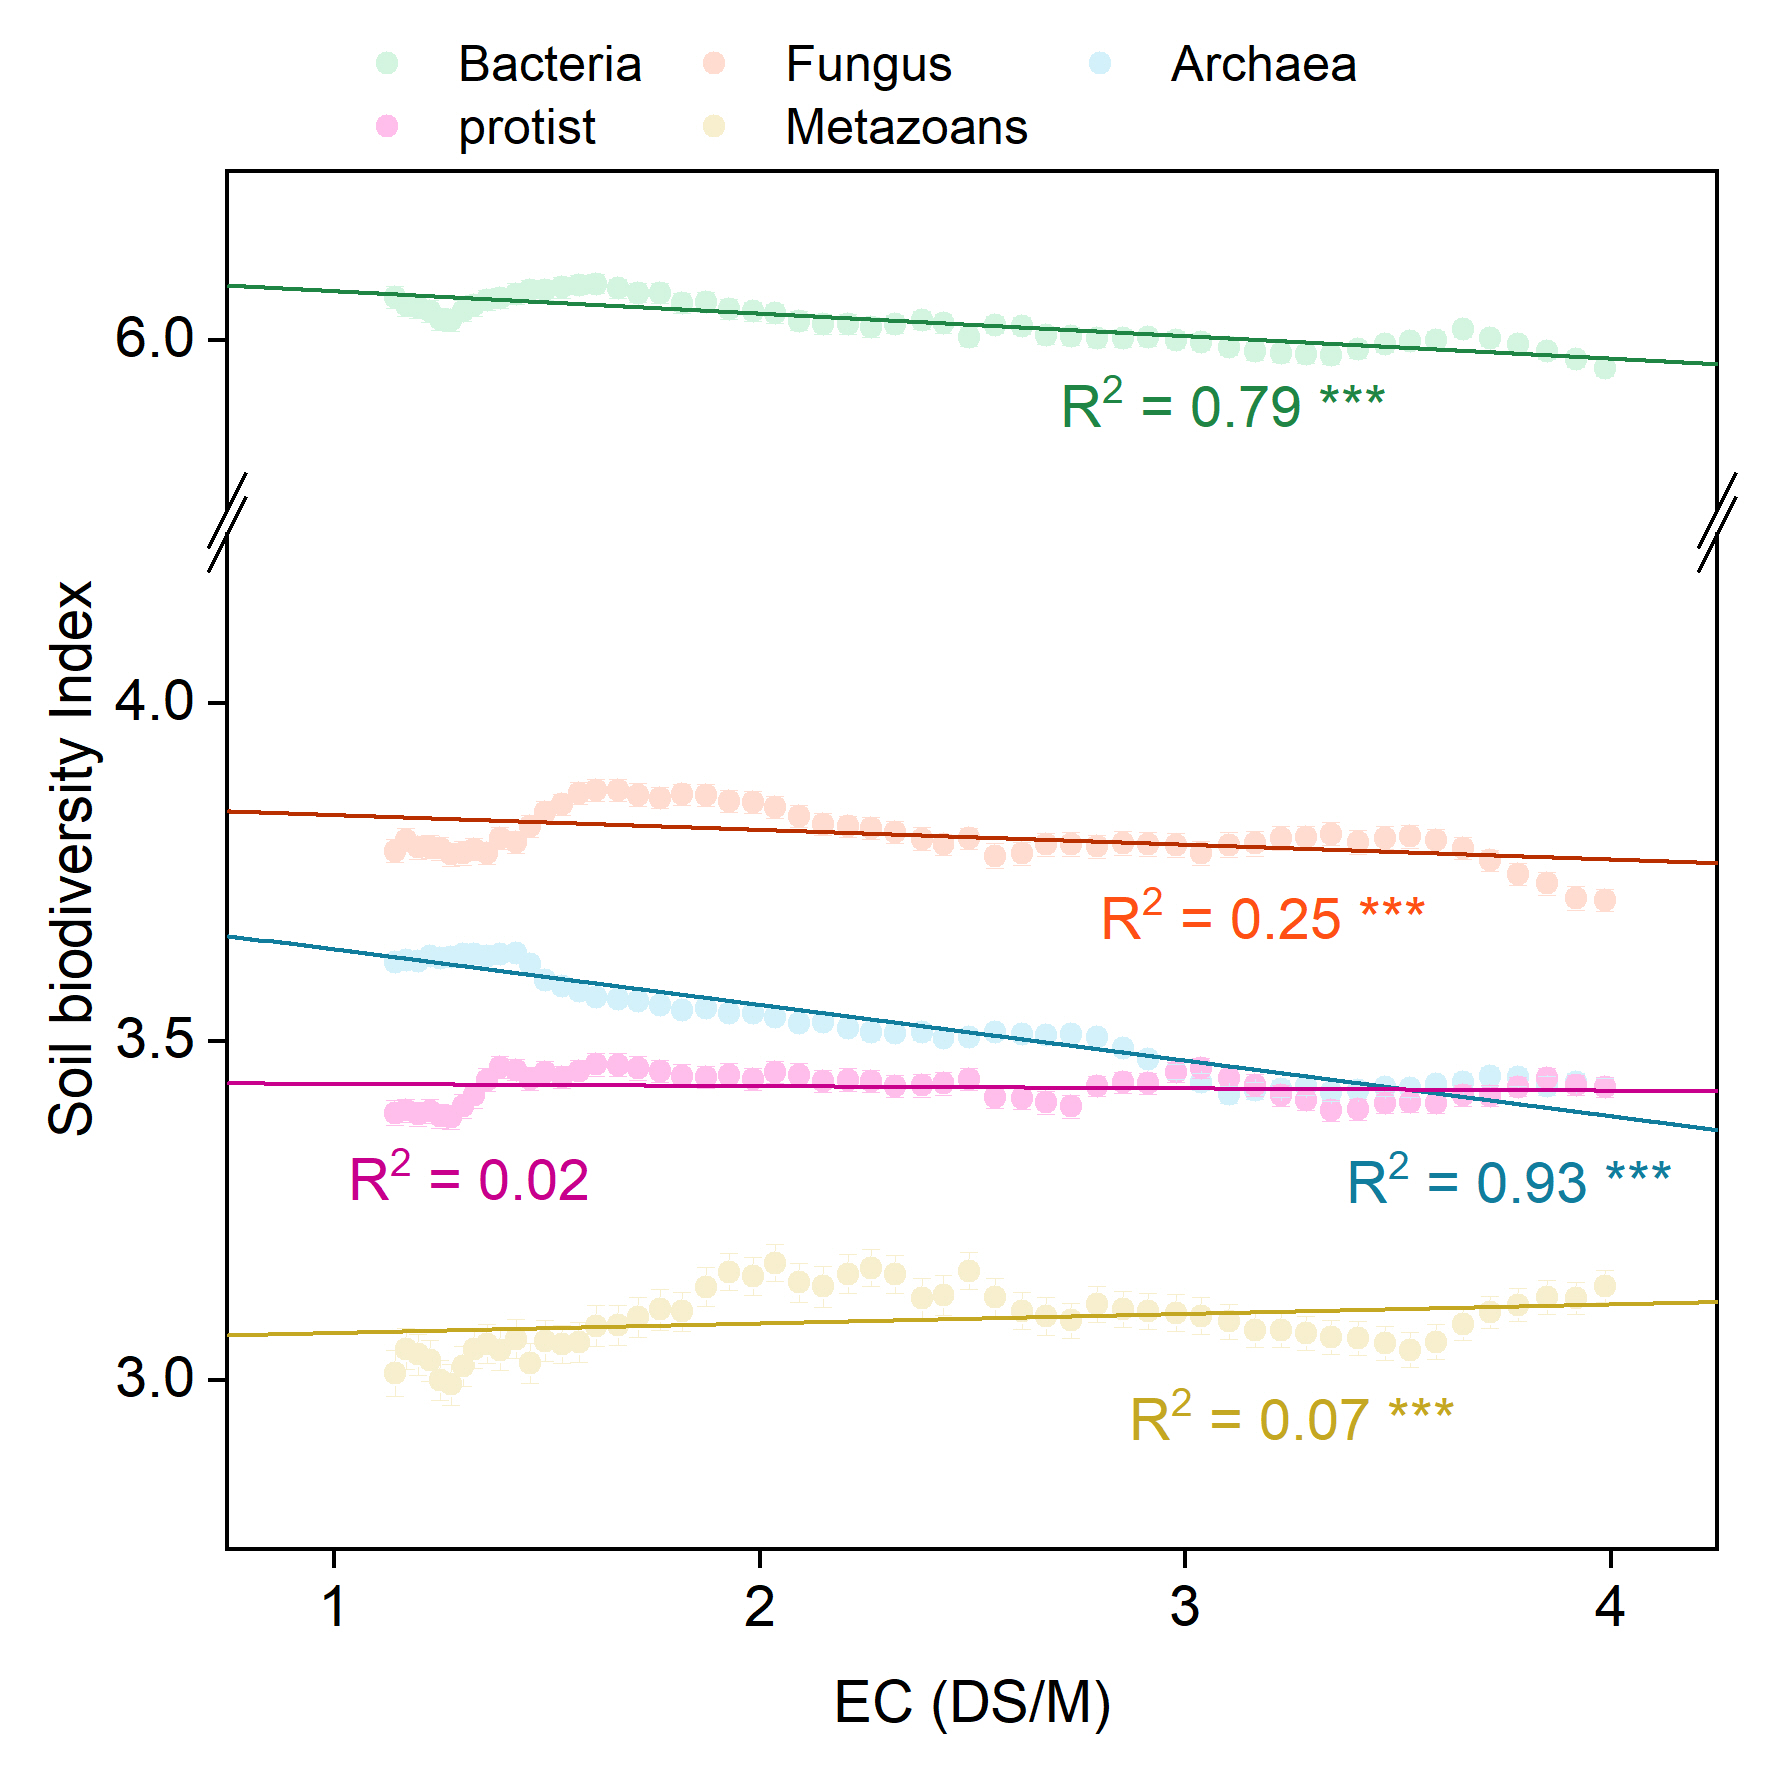


Fig. S5 Linear regression relationship between individual soil diversity index and soil EC.


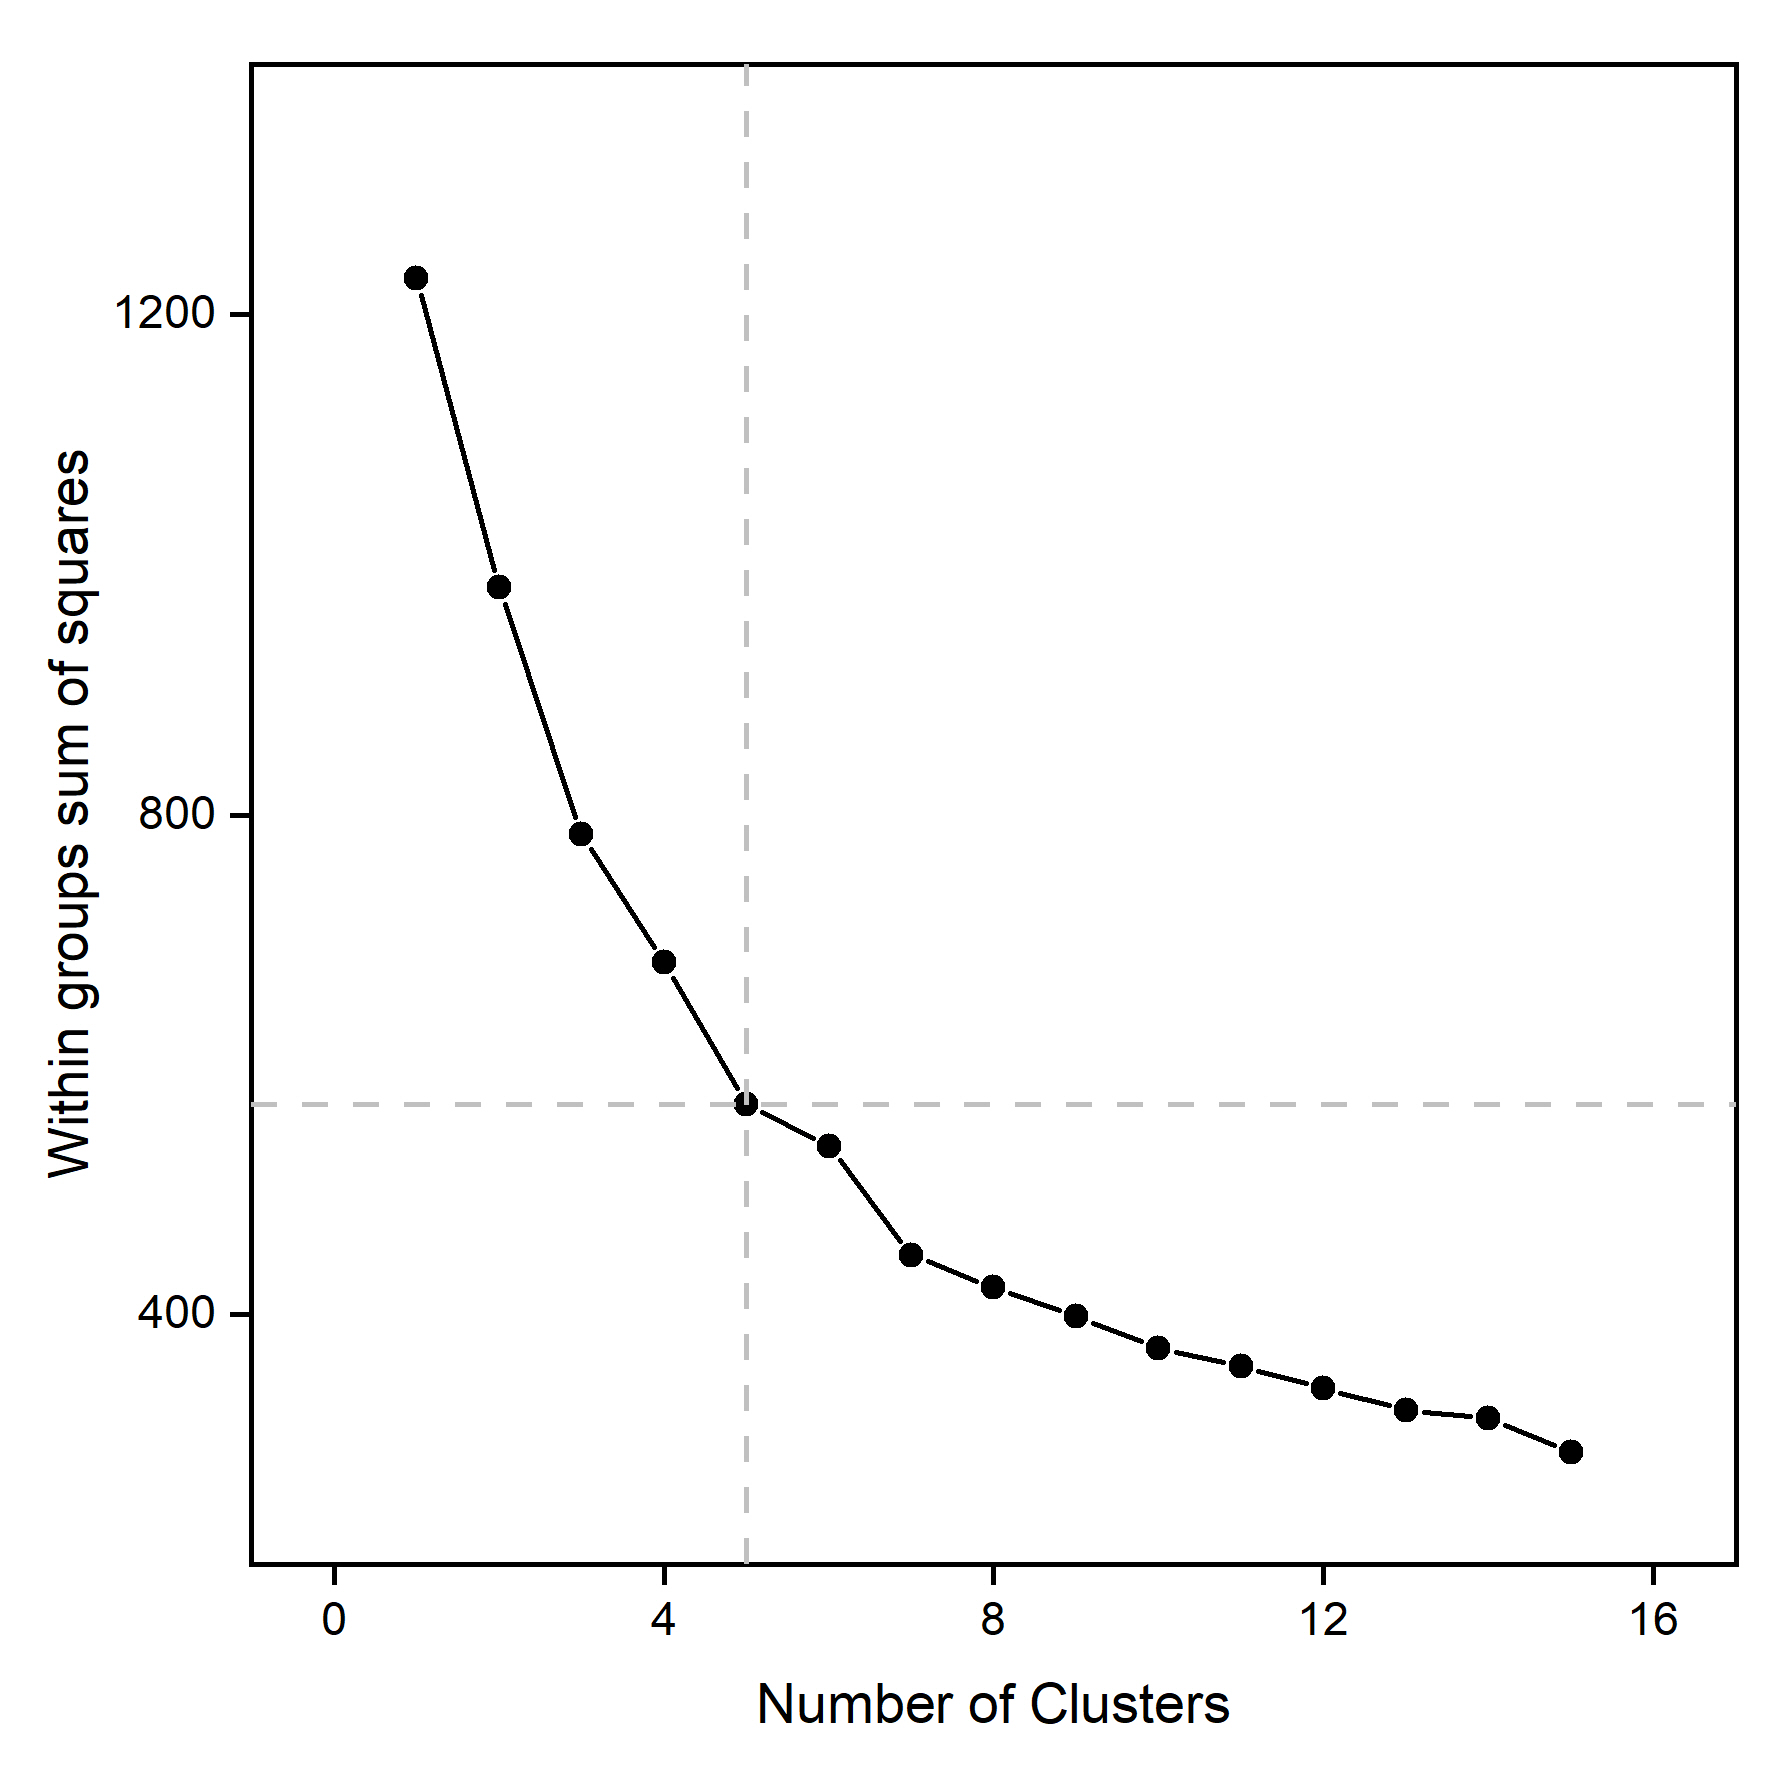


Fig. S6 The relationship between Number of Clusters and Within groups sum of squares


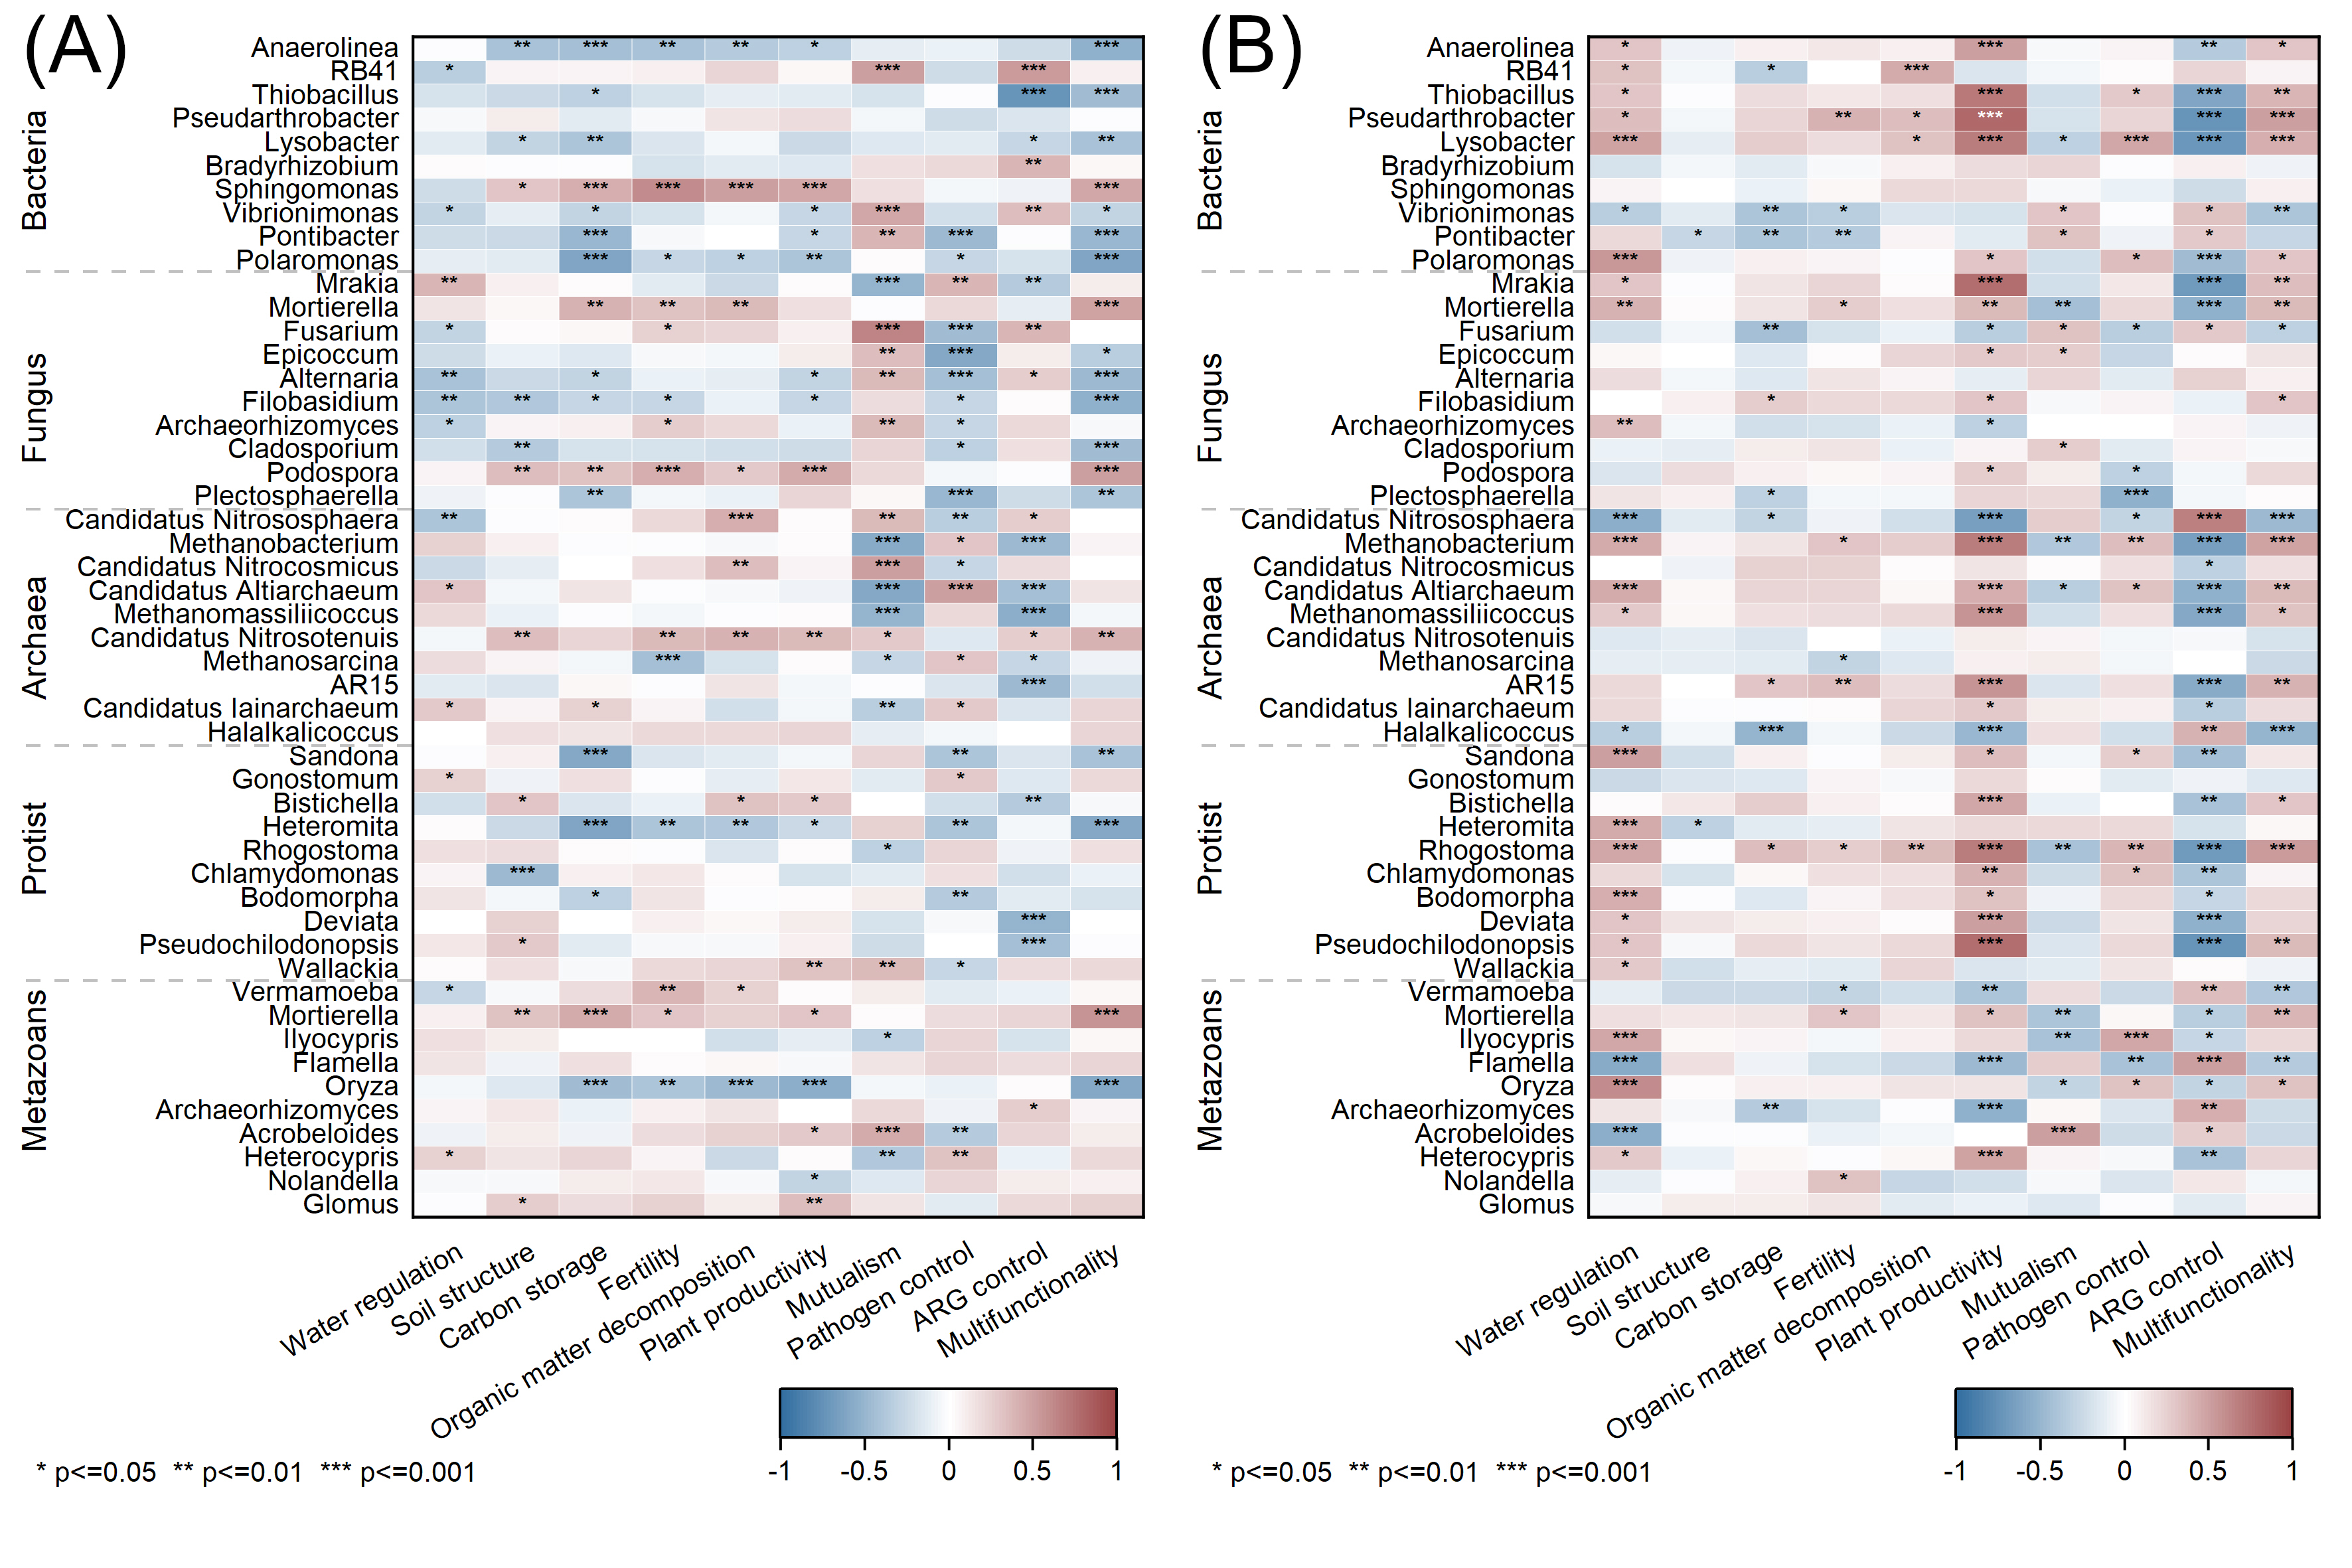


Fig. S7 The Spearman correlation coefficient between the abundance of the top 10 dominant genus groups in the main soil communities and soil function, in both non-saline (A) and saline soils (B).


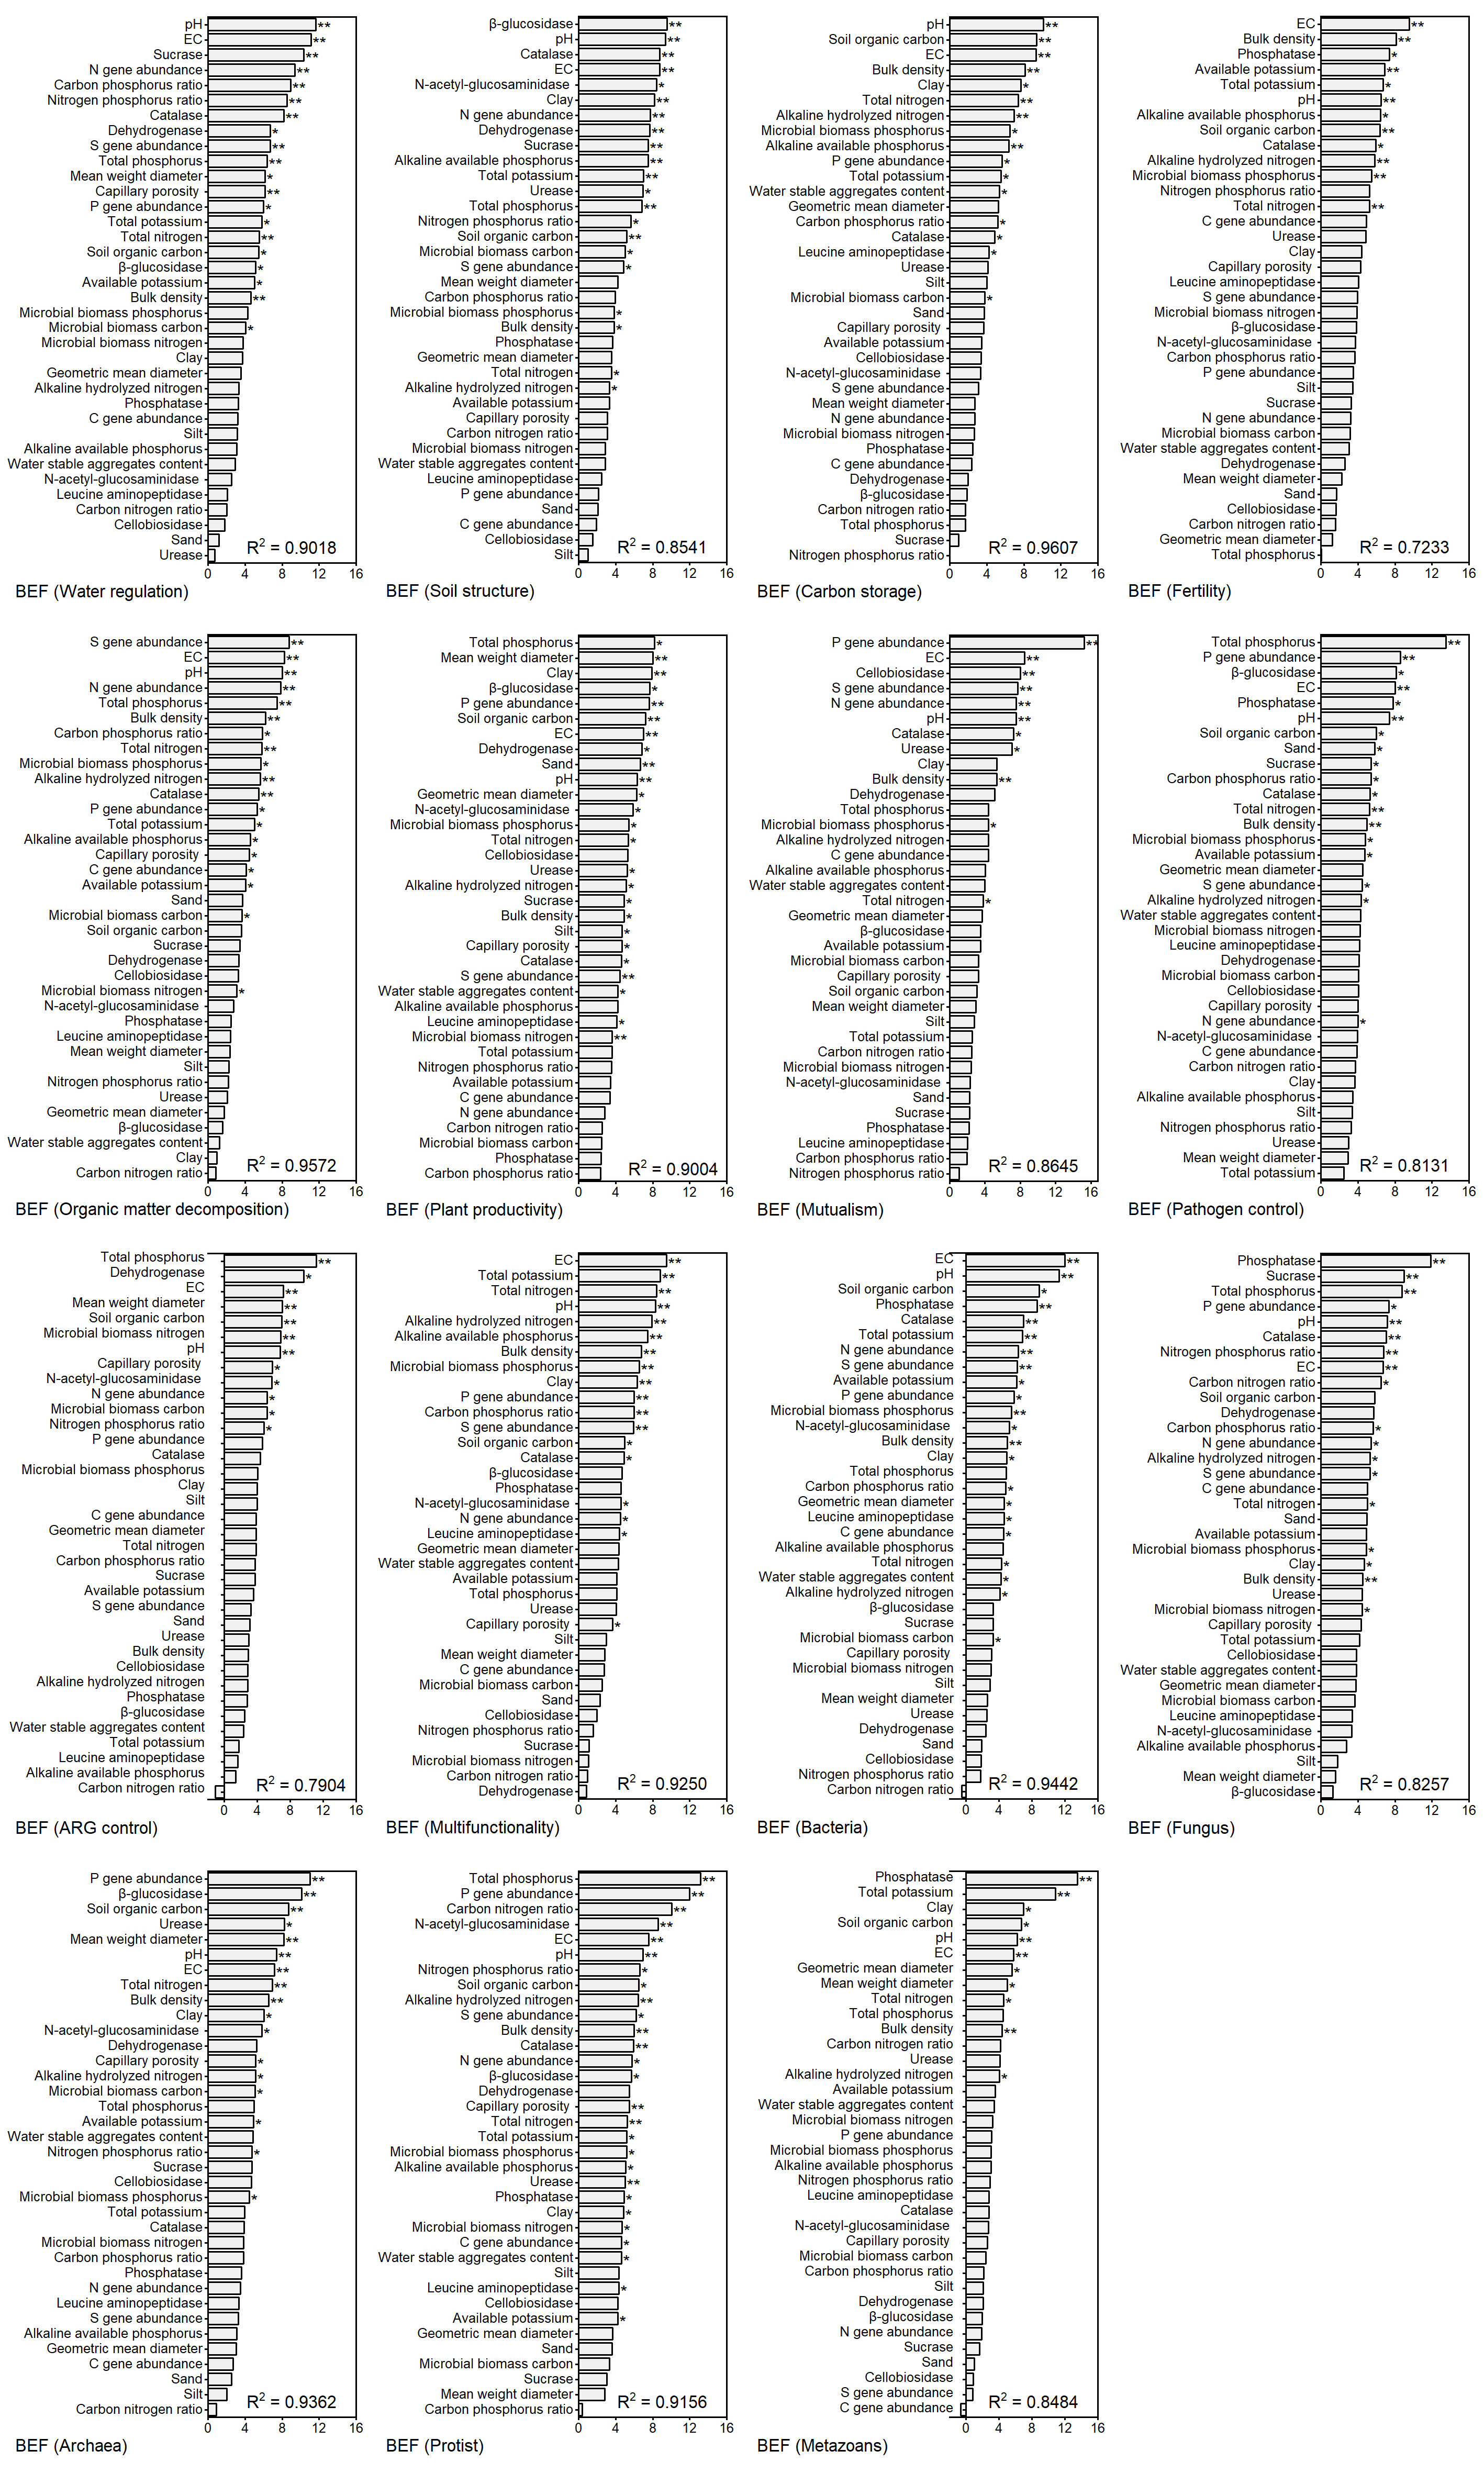


Fig. S8 Importance of soil properties in driving the distribution of the local relationship between soil multidiversity and ecosystem function (BEF).


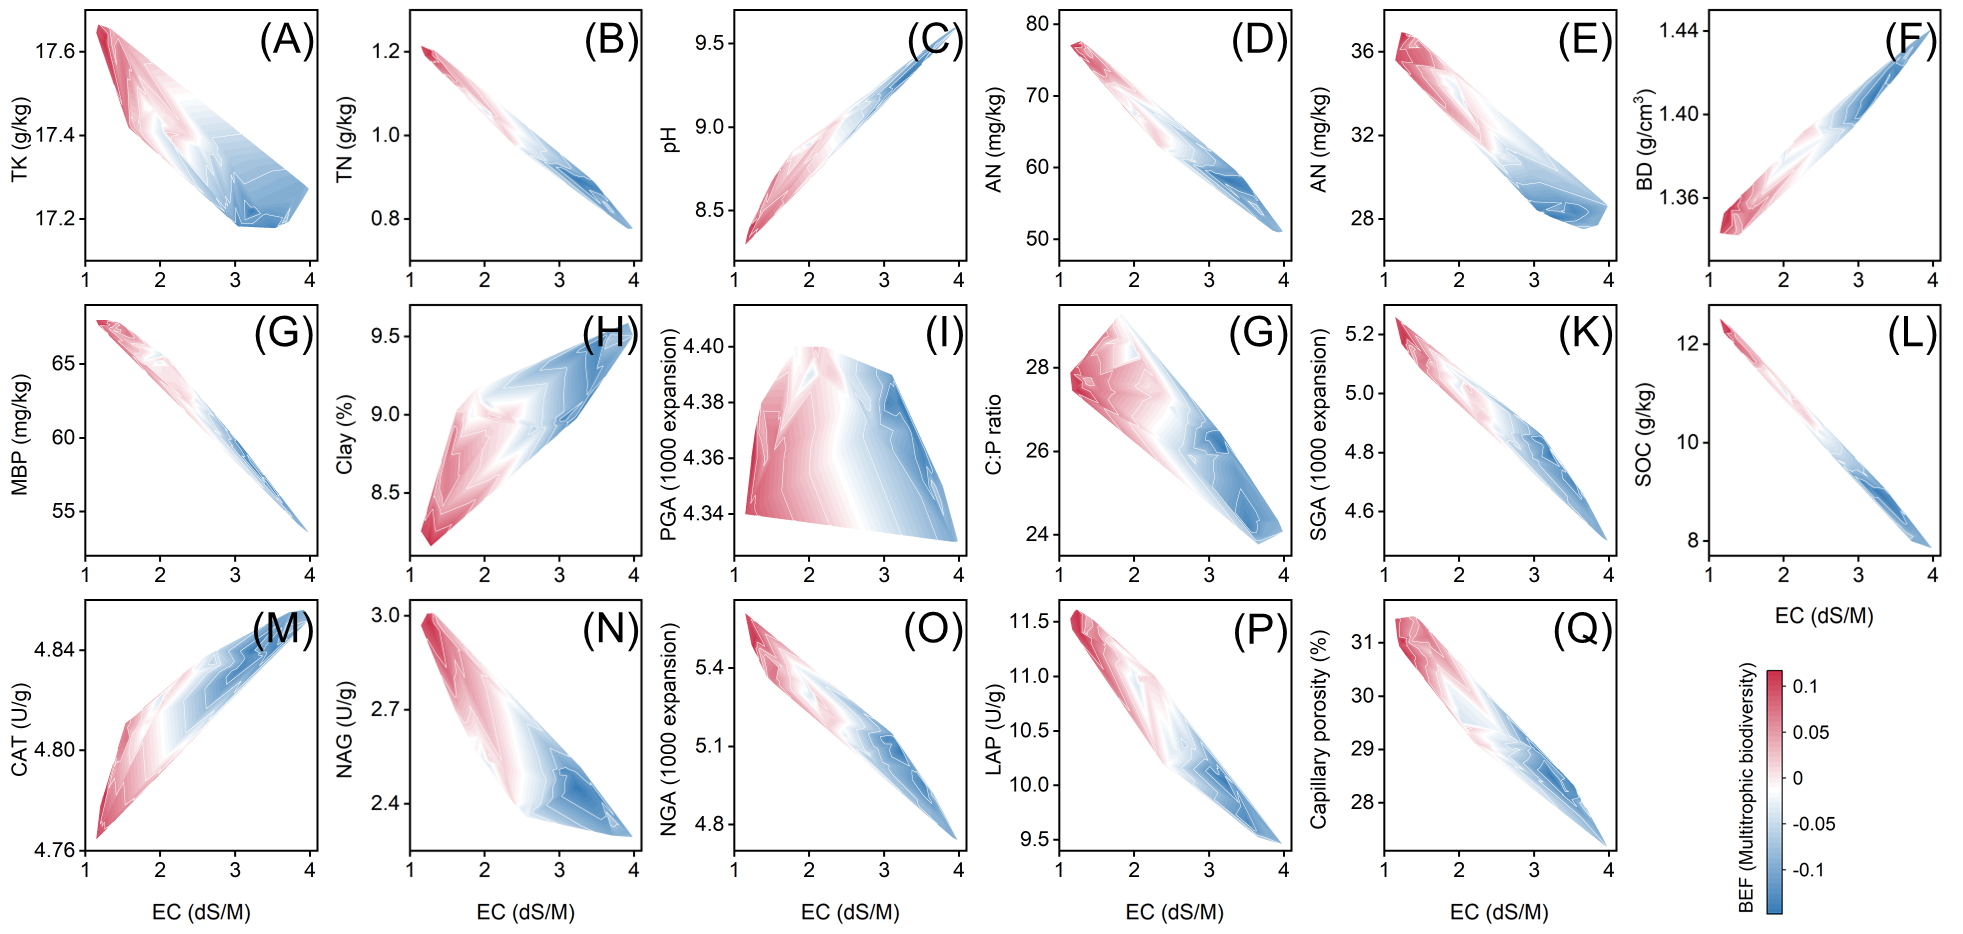


Fig. S9 Heatmap of the BEF relationship (soil multitrophic diversity and multifunctionality) with soil salinization and other soil factors. The red, white, and blue colors represent key information about the BEF relationship as soil salinization and environmental factors. TK, Total potassium; TN, Total nitrogen; AN, Alkaline hydrolyzed nitrogen; BD, Bulk density; MBP, Microbial biomass phosphorus; PGA, P gene abundance; C:P ratio, Carbon phosphorus ratio; SGA, S gene abundance; SOC, Soil organic carbon; CAT, Catalase; NAG, N-acetyl-glucosaminidase; NGA, N gene abundance; LAP, Leucine-aminopeptidase.


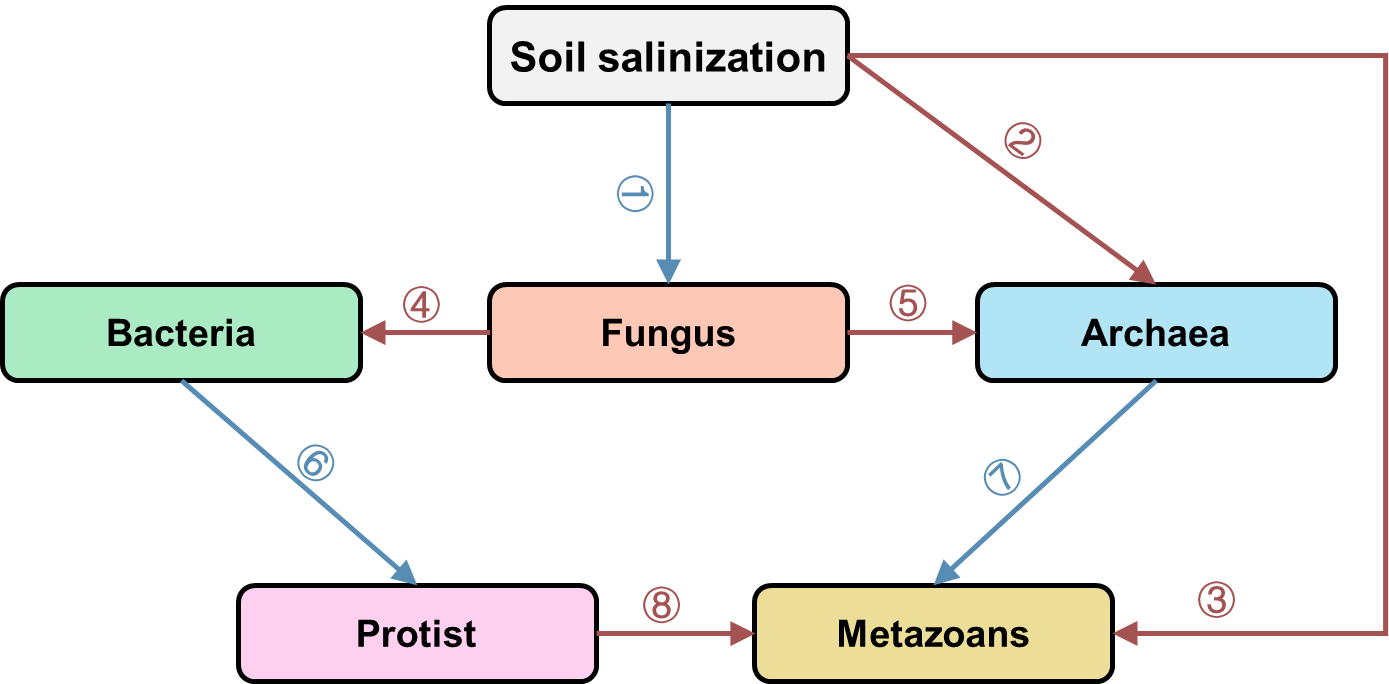


Fig. S10 The logic behind model construction for structural equation model to dissect the influences of soil salinization on various biological communities.


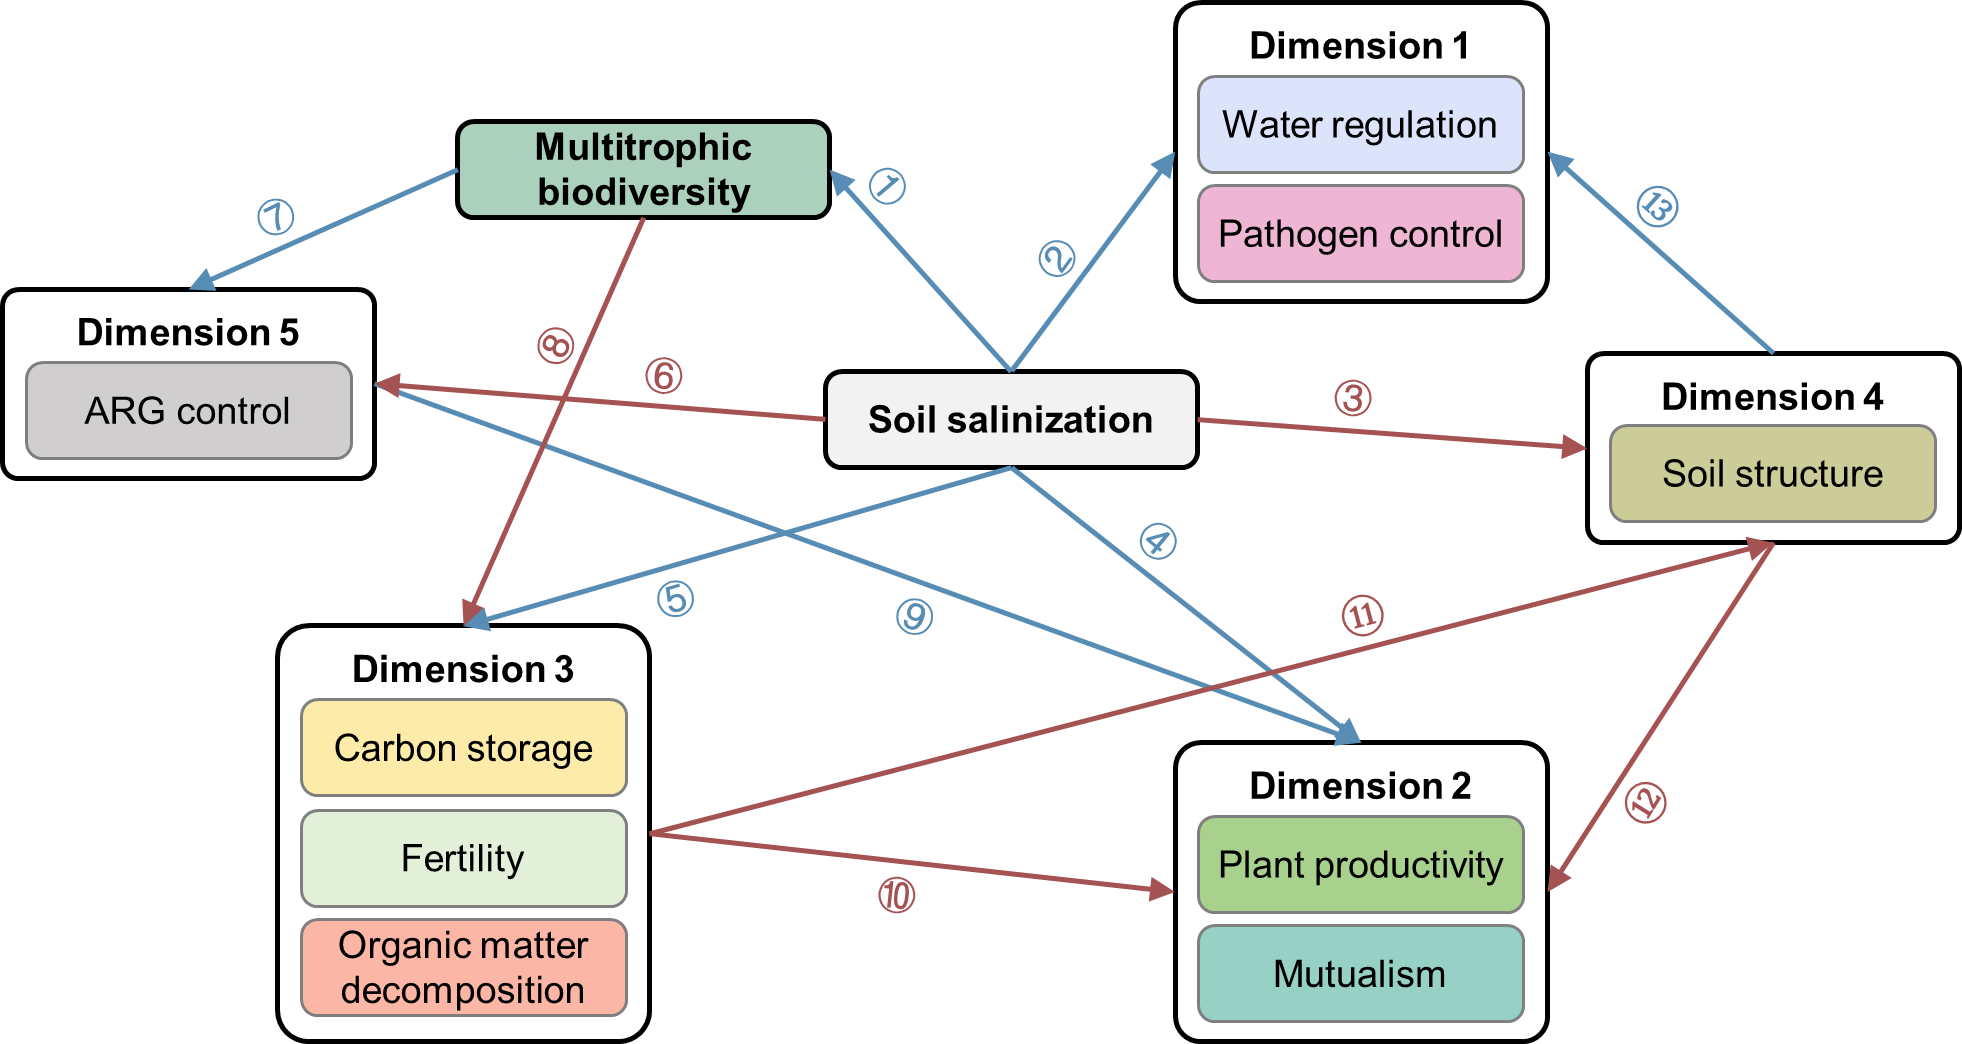


Fig. S11 The logic behind model construction for structural equation model to dissect the interconnections between soil multitrophic biodiversity and soil function.

Table S1 Basic information of 115 plots

| Sampling location num | Cultivation period (year) | EC (dS/M) | Types of cultivated crops | 5-YEAR average yield (t/ha) |
| --- | --- | --- | --- | --- |
| 1 | 1 | 4.19 | Paddy fields (rice) | 1.5 |
| 2 | 1 | 4.64 | Paddy fields (rice) | 1.84 |
| 3 | 1 | 4.74 | Paddy fields (rice) | 1.72 |
| 4 | 1 | 2.55 | Paddy fields (rice) | 1.69 |
| 5 | 1 | 4.52 | Paddy fields (rice) | 1.75 |
| 6 | 3 | 1.93 | Paddy fields (rice) | 4.72 |
| 7 | 3 | 1.5 | Paddy fields (rice) | 4.56 |
| 8 | 3 | 1.99 | Paddy fields (rice) | 5.03 |
| 9 | 3 | 2.25 | Paddy fields (rice) | 5.06 |
| 10 | 3 | 1.82 | Paddy fields (rice) | 5.22 |
| 11 | 5 | 3.1 | Paddy fields (rice) | 8.6 |
| 12 | 5 | 1.72 | Paddy fields (rice) | 8.68 |
| 13 | 5 | 2.3 | Paddy fields (rice) | 9.14 |
| 14 | 5 | 1.96 | Paddy fields (rice) | 8.56 |
| 15 | 5 | 2.13 | Paddy fields (rice) | 8.98 |
| 16 | 10 | 0.63 | Paddy fields (rice) | 9 |
| 17 | 10 | 0.85 | Paddy fields (rice) | 8.41 |
| 18 | 10 | 0.66 | Paddy fields (rice) | 8.09 |
| 19 | 10 | 0.68 | Paddy fields (rice) | 8.54 |
| 20 | 10 | 0.6 | Paddy fields (rice) | 8.84 |
| 21 | 15 | 0.91 | Paddy fields (rice) | 8.58 |
| 22 | 15 | 1.43 | Paddy fields (rice) | 8.34 |
| 23 | 15 | 1.45 | Paddy fields (rice) | 9.05 |
| 24 | 15 | 1.51 | Paddy fields (rice) | 8.9 |
| 25 | 15 | 0.83 | Paddy fields (rice) | 8.97 |
| 26 | 20 | 1.09 | Paddy fields (rice) | 8.55 |
| 27 | 20 | 1.37 | Paddy fields (rice) | 8.93 |
| 28 | 20 | 1.55 | Paddy fields (rice) | 9.17 |
| 29 | 20 | 1.2 | Paddy fields (rice) | 8.12 |
| 30 | 20 | 1.14 | Paddy fields (rice) | 8.63 |
| 31 | 30 | 0.88 | Paddy fields (rice) | 8.96 |
| 32 | 30 | 0.75 | Paddy fields (rice) | 8.45 |
| 33 | 30 | 0.61 | Paddy fields (rice) | 8.1 |
| 34 | 30 | 0.81 | Paddy fields (rice) | 8.08 |
| 35 | 30 | 1.67 | Paddy fields (rice) | 8.24 |
| 36 | 80 | 0.64 | Paddy fields (rice) | 8.91 |
| 37 | 80 | 0.71 | Paddy fields (rice) | 8.54 |
| 38 | 80 | 0.42 | Paddy fields (rice) | 8.54 |
| 39 | 80 | 0.73 | Paddy fields (rice) | 8.38 |
| 40 | 80 | 0.37 | Paddy fields (rice) | 8.77 |
| 41 | 3 | 4.92 | Paddy fields (rice) | 5.1 |
| 42 | 3 | 5.02 | Paddy fields (rice) | 5.12 |
| 43 | 3 | 4.76 | Paddy fields (rice) | 5.17 |
| 44 | 3 | 4.93 | Paddy fields (rice) | 5.13 |
| 45 | 3 | 5.07 | Paddy fields (rice) | 5.22 |
| 46 | 7 | 3.05 | Paddy fields (rice) | 8.5 |
| 47 | 7 | 2.81 | Paddy fields (rice) | 8.9 |
| 48 | 7 | 1.68 | Paddy fields (rice) | 8.67 |
| 49 | 7 | 2.29 | Paddy fields (rice) | 8.14 |
| 50 | 7 | 1.87 | Paddy fields (rice) | 8.59 |
| 51 | 10 | 1.29 | Paddy fields (rice) | 8.5 |
| 52 | 10 | 1.28 | Paddy fields (rice) | 8.41 |
| 53 | 10 | 0.99 | Paddy fields (rice) | 8.5 |
| 54 | 10 | 1.04 | Paddy fields (rice) | 8.87 |
| 55 | 10 | 1.07 | Paddy fields (rice) | 8.58 |
| 56 | 1 | 2.77 | Paddy fields (rice) | 1.5 |
| 57 | 1 | 1.28 | Paddy fields (rice) | 1.65 |
| 58 | 1 | 1.35 | Paddy fields (rice) | 1.72 |
| 59 | 1 | 1.88 | Paddy fields (rice) | 1.5 |
| 60 | 1 | 1.04 | Paddy fields (rice) | 1.65 |
| 61 | 9 | 1.11 | Paddy fields (rice) | 8.34 |
| 62 | 9 | 0.95 | Paddy fields (rice) | 8.58 |
| 63 | 9 | 0.79 | Paddy fields (rice) | 8.57 |
| 64 | 9 | 0.63 | Paddy fields (rice) | 8.45 |
| 65 | 9 | 0.48 | Paddy fields (rice) | 8.44 |
| 66 | 5 | 2.2 | Paddy fields (rice) | 8.37 |
| 67 | 5 | 3.7 | Paddy fields (rice) | 8.52 |
| 68 | 5 | 4.57 | Paddy fields (rice) | 9.09 |
| 69 | 5 | 5.01 | Paddy fields (rice) | 8.64 |
| 70 | 5 | 4.22 | Paddy fields (rice) | 8.42 |
| 71 | 15 | 1.53 | Paddy fields (rice) | 8.75 |
| 72 | 15 | 1.7 | Paddy fields (rice) | 8.42 |
| 73 | 15 | 1.33 | Paddy fields (rice) | 8.99 |
| 74 | 15 | 1.57 | Paddy fields (rice) | 8.42 |
| 75 | 15 | 1.29 | Paddy fields (rice) | 8.52 |
| 76 | 10 | 1.43 | Upland fields (corn) | 9.79 |
| 77 | 10 | 1.11 | Upland fields (corn) | 9.84 |
| 78 | 10 | 4.28 | Upland fields (corn) | 9.59 |
| 79 | 10 | 4.14 | Upland fields (corn) | 10.36 |
| 80 | 10 | 4.59 | Upland fields (corn) | 9.44 |
| 81 | 10 | 4.99 | Upland fields (corn) | 10.09 |
| 82 | 10 | 3.94 | Upland fields (corn) | 10.47 |
| 83 | 10 | 2.12 | Upland fields (corn) | 10.82 |
| 84 | 10 | 2.1 | Upland fields (corn) | 9.64 |
| 85 | 10 | 1.28 | Upland fields (corn) | 10.95 |
| 86 | 20 | 0.83 | Upland fields (corn) | 11.92 |
| 87 | 20 | 0.83 | Upland fields (corn) | 11.26 |
| 88 | 20 | 0.79 | Upland fields (corn) | 12.96 |
| 89 | 20 | 0.77 | Upland fields (corn) | 12.06 |
| 90 | 20 | 1.04 | Upland fields (corn) | 13.17 |
| 91 | 20 | 2.94 | Upland fields (corn) | 1.87 |
| 92 | 20 | 4.76 | Upland fields (corn) | 1.88 |
| 93 | 20 | 6.03 | Upland fields (corn) | 1.86 |
| 94 | 20 | 3.39 | Upland fields (corn) | 1.82 |
| 95 | 20 | 5.31 | Upland fields (corn) | 1.75 |
| 96 | 20 | 4.76 | Upland fields (corn) | 2.94 |
| 97 | 20 | 4.34 | Upland fields (corn) | 3.13 |
| 98 | 20 | 2.02 | Upland fields (corn) | 2.67 |
| 99 | 20 | 4.41 | Upland fields (corn) | 3.24 |
| 100 | 20 | 3.88 | Upland fields (corn) | 2.99 |
| 101 | 10 | 4.41 | Upland fields (corn) | 1.2 |
| 102 | 10 | 5.07 | Upland fields (corn) | 1.76 |
| 103 | 10 | 3.72 | Upland fields (corn) | 1.38 |
| 104 | 10 | 5.07 | Upland fields (corn) | 1 |
| 105 | 10 | 5.04 | Upland fields (corn) | 0.62 |
| 106 | 5 | 5.18 | Upland fields (corn) | 3.16 |
| 107 | 5 | 5.69 | Upland fields (corn) | 2.96 |
| 108 | 5 | 5.72 | Upland fields (corn) | 2.58 |
| 109 | 5 | 5.82 | Upland fields (corn) | 2.4 |
| 110 | 5 | 5.54 | Upland fields (corn) | 2.16 |
| 111 | 1 | 5.12 | Upland fields (corn) | 0 |
| 112 | 1 | 5.18 | Upland fields (corn) | 0 |
| 113 | 1 | 5.15 | Upland fields (corn) | 0 |
| 114 | 1 | 5.15 | Upland fields (corn) | 0 |
| 115 | 1 | 4.11 | Upland fields (corn) | 0 |

Table S2 The network parameter of total network and sub networks of various biological communities

| Number | Soil Salinization | Network | Nodes number | Edges number | Positive correlation number | Negative correlation number | Average path length (1012 expanded) | Network diameter (1012 expanded) | Network density | Clustering coefficient |
| --- | --- | --- | --- | --- | --- | --- | --- | --- | --- | --- |
| 1 | No-saline | Archaea | 2 | 1 | 0 | 0 | 0.0004 | 0.0004 | 1 | 0 |
| 2 | Saline | Archaea | 4 | 2 | 0 | 0 | 2.1764 | 2.4984 | 0.3333 | 0 |
| 3 | No-saline | Bacteria | 82 | 87 | 0 | 0 | 3.3556 | 21.7777 | 0.0262 | 0.4247 |
| 4 | Saline | Bacteria | 118 | 193 | 0 | 0 | 30.3245 | 215.6537 | 0.028 | 0.3943 |
| 5 | No-saline | Fungus | 49 | 73 | 72 | 1 | 1.0062 | 10.7117 | 0.0621 | 0.6446 |
| 6 | Saline | Fungus | 47 | 83 | 83 | 0 | 3.1791 | 78.568 | 0.0768 | 0.5789 |
| 7 | No-saline | Metazoans | 9 | 6 | 0 | 0 | 13.5109 | 26.8279 | 0.1667 | 0 |
| 8 | Saline | Metazoans | 22 | 96 | 0 | 0 | 6.7583 | 61.5226 | 0.4156 | 0.7522 |
| 9 | No-saline | Protist | 5 | 3 | 0 | 0 | 25.1217 | 50.2431 | 0.3 | 0 |
| 10 | Saline | Protist | 8 | 9 | 0 | 0 | 46.1333 | 122.2831 | 0.3214 | 0.4737 |
| 11 | No-saline | Archaea-Bacteria | 85 | 92 | 87 | 5 | 4.9577 | 26.2004 | 0.0258 | 0.425 |
| 12 | Saline | Archaea-Bacteria | 123 | 210 | 205 | 5 | 30.783 | 208.5629 | 0.028 | 0.3947 |
| 13 | No-saline | Archaea-Fungus | 52 | 75 | 73 | 2 | 1.0602 | 11.3181 | 0.0566 | 0.642 |
| 14 | Saline | Archaea-Fungus | 51 | 85 | 85 | 0 | 3.667 | 83.9426 | 0.0667 | 0.5789 |
| 15 | No-saline | Bacteria-Fungus | 136 | 213 | 209 | 4 | 2.9163 | 26.2226 | 0.0232 | 0.593 |
| 16 | Saline | Bacteria-Fungus | 169 | 349 | 344 | 5 | 34.483 | 291.4144 | 0.0246 | 0.4899 |
| 17 | No-saline | Archaea-Metazoans | 11 | 7 | 7 | 0 | 11.7108 | 25.6346 | 0.1273 | 0 |
| 18 | Saline | Archaea-Metazoans | 26 | 98 | 98 | 0 | 7.4857 | 67.5953 | 0.3015 | 0.7522 |
| 19 | No-saline | Bacteria-Metazoans | 98 | 106 | 104 | 2 | 12.2172 | 67.3901 | 0.0223 | 0.3938 |
| 20 | Saline | Bacteria-Metazoans | 148 | 394 | 389 | 5 | 25.4948 | 220.757 | 0.0362 | 0.5914 |
| 21 | No-saline | Fungus-Metazoans | 65 | 93 | 92 | 1 | 2.6564 | 23.846 | 0.0447 | 0.5863 |
| 22 | Saline | Fungus-Metazoans | 77 | 336 | 336 | 0 | 4.6567 | 83.89 | 0.1148 | 0.6838 |
| 23 | No-saline | Archaea-Protist | 7 | 4 | 4 | 0 | 16.734 | 41.797 | 0.1905 | 0 |
| 24 | Saline | Archaea-Protist | 13 | 12 | 12 | 0 | 58.739 | 181.8643 | 0.1538 | 0.45 |
| 25 | No-saline | Bacteria-Protist | 95 | 99 | 97 | 2 | 8.0344 | 44.6976 | 0.0222 | 0.3967 |
| 26 | Saline | Bacteria-Protist | 132 | 242 | 234 | 8 | 44.1716 | 341.4222 | 0.028 | 0.4175 |
| 27 | No-saline | Fungus-Protist | 56 | 81 | 80 | 1 | 2.8872 | 29.6294 | 0.0526 | 0.6395 |
| 28 | Saline | Fungus-Protist | 60 | 150 | 150 | 0 | 11.893 | 128.9324 | 0.0847 | 0.5937 |
| 29 | No-saline | Metazoans-Protist | 20 | 14 | 14 | 0 | 29.8761 | 70.9277 | 0.0737 | 0 |
| 30 | Saline | Metazoans-Protist | 33 | 161 | 161 | 0 | 14.4758 | 134.0958 | 0.3049 | 0.7192 |
| 31 | No-saline | Multitrophic | 177 | 274 | 266 | 8 | 10.9948 | 73.6753 | 0.0176 | 0.5423 |
| 32 | Saline | Multitrophic | 233 | 888 | 880 | 8 | 26.4569 | 279.5117 | 0.0329 | 0.6116 |

Table S3 The generalized linear model of soil EC and soil properties that reflecting their independent and interactive effects respectively. The soil properties were selected from random forests model, which significantly affect the BEF relationship between soil EMF and multidiversity.

| Soil properties | The estimate of soil properties | Interaction effect | The estimate of EC | Intercept |
| --- | --- | --- | --- | --- |
| Total potassium | 0.1 ± 0.18 | 0.53 ± 0.11 *** | -0.32 ± 0.11 ** | 0.37 ± 0.1 *** |
| Total nitrogen | -1 ± 0.17 *** | -0.89 ± 0.3 ** | -1.63 ± 0.3 *** | 1.83 ± 0.3 *** |
| pH | 1.01 ± 0.22 *** | 0.22 ± 0.26 | -1.98 ± 0.37 *** | 0.92 ± 0.04 *** |
| Alkaline hydrolyzed nitrogen | -0.97 ± 0.17 *** | -0.51 ± 0.23 * | -1.27 ± 0.23 *** | 1.46 ± 0.23 *** |
| Alkaline available phosphorus | -0.33 ± 0.2 | 0.55 ± 0.18 ** | -0.24 ± 0.21 | 0.35 ± 0.18 |
| Bulk density | 0.69 ± 0.15 *** | 0.39 ± 0.21 | -1.83 ± 0.21 *** | 0.92 ± 0.03 *** |
| Microbial biomass phosphorus | -0.64 ± 0.23 ** | 0.21 ± 0.56 | -0.58 ± 0.59 | 0.72 ± 0.57 |
| Clay | 0.78 ± 0.15 *** | -0.25 ± 0.09 * | -1.34 ± 0.13 *** | 0.97 ± 0.04 *** |
| P gene abundance | -0.39 ± 0.19 * | -0.05 ± 0.11 | -0.72 ± 0.09 *** | 0.93 ± 0.06 *** |
| Carbon phosphorus ratio | -0.42 ± 0.22 | -0.15 ± 0.17 | -0.92 ± 0.15 *** | 1.04 ± 0.13 *** |
| S gene abundance | -0.59 ± 0.16 *** | -0.85 ± 0.29 ** | -1.48 ± 0.26 *** | 1.71 ± 0.26 *** |
| Soil organic carbon | -0.67 ± 0.17 *** | -0.51 ± 0.57 | -1.32 ± 0.57 * | 1.44 ± 0.56 * |
| Catalase | 1.9 ± 0.29 *** | 0.3 ± 0.14 * | -2.89 ± 0.35 *** | 0.92 ± 0.04 *** |
| N-acetyl-glucosaminidase | -1.3 ± 0.2 *** | 0.1 ± 0.07 | -0.68 ± 0.08 *** | 0.87 ± 0.06 *** |
| N gene abundance | 0.35 ± 0.23 | -0.2 ± 0.11 | -1.03 ± 0.15 *** | 0.96 ± 0.06 *** |
| Leucine-aminopeptidase | -0.67 ± 0.16 *** | -0.22 ± 0.2 | -1.06 ± 0.22 *** | 1.17 ± 0.2 *** |
| Capillary porosity | -0.93 ± 0.16 *** | -0.32 ± 0.16 | -1.02 ± 0.15 *** | 1.25 ± 0.15 *** |

**References**

1. Delgado-Baquerizo M*, et al.* Multiple elements of soil biodiversity drive ecosystem functions across biomes. *Nat Ecol Evol* **4**, 210-220 (2020).

2. Ryżak M, Bieganowski A. Methodological aspects of determining soil particle-size distribution using the laser diffraction method. *Journal of Plant Nutrition and Soil Science* **174**, 624-633 (2011).

3. Abid M, Lal R. Tillage and drainage impact on soil quality: I. Aggregate stability, carbon and nitrogen pools. *Soil Tillage Res* **100**, 89-98 (2008).

4. Jabro JD, Mikha MM. Determination of Infiltration Rate and Bulk Density in Soils. In: *Soil Health Series*) (2021).

5. Fan K*, et al.* Soil biodiversity supports the delivery of multiple ecosystem functions in urban greenspaces. *Nat Ecol Evol* **7**, 113-126 (2023).

6. Bremner JM, Mulvaney CS. Nitrogen-total. In: Page, A.L. (Ed.), Methods of Soil Analysis. Part 3 - chemical methods. *American Society of Agronomy, Madison*, pp. 595–624 (1982).

7. Sommers LE, Nelson DW. Determination of Total Phosphorus in Soils: A Rapid Perchloric Acid Digestion Procedure. *Soil Sci Soc Am J* **36**, 902-904 (1972).

8. Pratt PF. Digestion with hydrofluoric and perchloric acids for total potassium and sodium. In: *Methods of Soil Analysis*) (1965).

9. Drescher GL*, et al.* Alkaline hydrolyzable nitrogen and properties that dictate its distribution in paddy soil profiles. *Pedosphere* **30**, 326-335 (2020).

10. Dalal RC. Estimation of available phosphorus in soils by extraction with sodium hydroxide sodium carbonate solution. *Journal of the Australian Institute of Agricultural Science* **39**, 142-143 (1973).

11. Cleveland CC, Liptzin D. C:N:P stoichiometry in soil: is there a “Redfield ratio” for the microbial biomass? *Biogeochemistry* **85**, 235-252 (2007).

12. Stott DE, Andrews SS, Liebig MA, Wienhold BJ, Karlen DL. Evaluation of β-Glucosidase Activity as a Soil Quality Indicator for the Soil Management Assessment Framework. *Soil Sci Soc Am J* **74**, 107-119 (2010).

13. Nannipieri P, Ceccanti B, Cervelli S, Matarese E. Extraction of Phosphatase, Urease, Proteases, Organic Carbon, and Nitrogen from Soil. *Soil Sci Soc Am J* **45**, (1981).

14. von Mersi W, Schinner F. An improved and accurate method for determining the dehydrogenase activity of soils with iodonitrotetrazolium chloride. *Biology and Fertility of Soils* **11**, 216-220 (1991).

15. Mbuthia LW*, et al.* Long term tillage, cover crop, and fertilization effects on microbial community structure, activity: Implications for soil quality. *Soil Biol Biochem* **89**, 24-34 (2015).

16. Saiya-Cork KR, Sinsabaugh RL, Zak DR. The effects of long term nitrogen deposition on extracellular enzyme activity in an Acer saccharum forest soil. *Soil Biol Biochem* **34**, 1309-1315 (2002).

17. Wittmann C, Kähkönen MA, Ilvesniemi H, Kurola J, Salkinoja-Salonen MS. Areal activities and stratification of hydrolytic enzymes involved in the biochemical cycles of carbon, nitrogen, sulphur and phosphorus in podsolized boreal forest soils. *Soil Biol Biochem* **36**, 425-433 (2004).

18. Cakmak I, Strbac D, Marschner H. Activities of Hydrogen Peroxide-Scavenging Enzymes in Germinating Wheat Seeds. *J Exp Bot* **44**, 127-132 (1993).

19. Bolger AM, Lohse M, Usadel B. Trimmomatic: a flexible trimmer for Illumina sequence data. *Bioinformatics* **30**, 2114-2120 (2014).

20. Patro R, Duggal G, Love MI, Irizarry RA, Kingsford C. Salmon provides fast and bias-aware quantification of transcript expression. *Nat Methods* **14**, 417-419 (2017).

21. Hyatt D, Chen G-L, LoCascio PF, Land ML, Larimer FW, Hauser LJ. Prodigal: prokaryotic gene recognition and translation initiation site identification. *BMC Bioinf* **11**, 119 (2010).

22. Li D, Liu CM, Luo R, Sadakane K, Lam TW. MEGAHIT: an ultra-fast single-node solution for large and complex metagenomics assembly via succinct de Bruijn graph. *Bioinformatics* **31**, 1674-1676 (2015).

23. Fu L, Niu B, Zhu Z, Wu S, Li W. CD-HIT: accelerated for clustering the next-generation sequencing data. *Bioinformatics* **28**, 3150-3152 (2012).

24. He M*, et al.* The influence of soil salinization, induced by the backwater effect of the Yellow River, on microbial community dynamics and ecosystem functioning in arid regions. *Environmental Research* **262**, 119854 (2024).

25. Zhang L, Yang J, Ge A-H, Xie W, Yao R, Wang X. Salinity drives niche differentiation of soil bacteria and archaea in Hetao Plain, China. *J Environ Manage* **370**, 122977 (2024).

26. Wang C, Kuzyakov Y. Mechanisms and implications of bacterial–fungal competition for soil resources. *ISME J* **18**, wrae073 (2024).

27. Jiao S, Chu H, Zhang B, Wei X, Chen W, Wei G. Linking soil fungi to bacterial community assembly in arid ecosystems. *iMeta* **1**, e2 (2022).

28. Zhang G*, et al.* Microbial diversity and functions in saline soils: A review from a biogeochemical perspective. *J Adv Res* **59**, 129-140 (2024).

29. Cheung MK, Wong CK, Chu KH, Kwan HS. Community Structure, Dynamics and Interactions of Bacteria, Archaea and Fungi in Subtropical Coastal Wetland Sediments. *Sci Rep* **8**, 14397 (2018).

30. Saleem M, Fetzer I, Harms H, Chatzinotas A. Diversity of protists and bacteria determines predation performance and stability. *ISME J* **7**, 1912-1921 (2013).

31. Triplett LR, Taerum SJ, Patel RR. Protists at the plant-bacterial interface: Impacts and prospective applications. *Physiol Mol Plant Pathol* **125**, 102011 (2023).

32. Henriquez FL*, et al.* Paradigms of Protist/Bacteria Symbioses Affecting Human Health: Acanthamoeba species and Trichomonas vaginalis. *Front Microbiol* **11**, (2021).

33. Thurber AR, Levin LA, Orphan VJ, Marlow JJ. Archaea in metazoan diets: implications for food webs and biogeochemical cycling. *ISME J* **6**, 1602-1612 (2012).

34. Thompson AR, Roth-Monzón AJ, Aanderud ZT, Adams BJ. Phagotrophic Protists and Their Associates: Evidence for Preferential Grazing in an Abiotically Driven Soil Ecosystem. *Microorganisms* **9**, (2021).

35. Tang S, She D, Wang H. Effect of salinity on soil structure and soil hydraulic characteristics. *Can J Soil Sci* **101**, 62-73 (2020).

36. Robinson DA*, et al.* Analytical modelling of soil porosity and bulk density across the soil organic matter and land-use continuum. *Sci Rep* **12**, 7085 (2022).

37. Mukhopadhyay R, Sarkar B, Jat HS, Sharma PC, Bolan NS. Soil salinity under climate change: Challenges for sustainable agriculture and food security. *J Environ Manage* **280**, 111736 (2021).

38. Shrivastava P, Kumar R. Soil salinity: A serious environmental issue and plant growth promoting bacteria as one of the tools for its alleviation. *Saudi J Biol Sci* **22**, 123-131 (2015).

39. Zhou T*, et al.* Sulfur dynamics in saline sodic soils: The role of paddy cultivation and organic amendments. *Ecol Indic* **162**, 112014 (2024).

40. Yu J, Wang Z, Meixner FX, Yang F, Wu H, Chen X. Biogeochemical Characterizations and Reclamation Strategies of Saline Sodic Soil in Northeastern China. *CLEAN – Soil, Air, Water* **38**, 1010-1016 (2010).

41. Singh A. Soil salinity: A global threat to sustainable development. *Soil Use Manage* **38**, 39-67 (2022).

42. Follett RF. Soil management concepts and carbon sequestration in cropland soils. *Soil Tillage Res* **61**, 77-92 (2001).

43. Jechalke S, Heuer H, Siemens J, Amelung W, Smalla K. Fate and effects of veterinary antibiotics in soil. *Trends Microbiol* **22**, 536-545 (2014).

44. Zhou T*, et al.* Converted paddy to upland in saline-sodic land could improve soil ecosystem multifunctionality by enhancing soil quality and alleviating microbial metabolism limitation. *Sci Total Environ* **924**, 171707 (2024).

45. Philippot L, Chenu C, Kappler A, Rillig MC, Fierer N. The interplay between microbial communities and soil properties. *Nat Rev Microbiol* **22**, 226-239 (2024).

46. Zhu XF, Jackson RD, DeLucia EH, Tiedje JM, Liang C. The soil microbial carbon pump: From conceptual insights to empirical assessments. *Glob Change Biol* **26**, 6032-6039 (2020).

47. Williams-Nguyen J*, et al.* Antibiotics and Antibiotic Resistance in Agroecosystems: State of the Science. *Journal of Environmental Quality* **45**, 394-406 (2016).

48. Lal R. Soil Carbon Sequestration Impacts on Global Climate Change and Food Security. *Science* **304**, 1623-1627 (2004).

49. Ma Y, Woolf D, Fan M, Qiao L, Li R, Lehmann J. Global crop production increase by soil organic carbon. *Nat Geosci* **16**, 1159-1165 (2023).

50. Hartmann M, Six J. Soil structure and microbiome functions in agroecosystems. *Nat Rev Earth Environ* **4**, 4-18 (2023).

51. Kumar DA, Kannathasan N. A study and characterization of chemical properties of soil surface data using K-means algorithm. In: *2013 International Conference on Pattern Recognition, Informatics and Mobile Engineering*) (2013).

52. Hot E, Popović-Bugarin V. Soil data clustering by using K-means and fuzzy K-means algorithm. In: *2015 23rd Telecommunications Forum Telfor (TELFOR)*) (2015).

53. Li Z*, et al.* Climatic humidity mediates the strength of the species richness–biomass relationship on the Mongolian Plateau steppe. *Sci Total Environ* **718**, 137252 (2020).

54. Zeileis A, Kleiber C, Jackman S. Regression Models for Count Data in R. *J Stat Softw* **27**, 1 - 25 (2008).
